# Unique Proteomes Implicate Functional Specialization across Heterocysts, Akinetes, and Vegetative Cells in *Anabaena cylindrica*

Yeyan Qiu<sup>1</sup>, Liping Gu<sup>1\*</sup>, Volker Brözel<sup>1,2</sup>, Douglas Whitten<sup>3</sup>, Michael Hildreth<sup>1</sup> and Ruanbao Zhou<sup>1,4\*</sup>

<sup>1</sup>Department of Biology and Microbiology, South Dakota State University, Brookings, USA

<sup>2</sup>Department of Microbiology and Plant Pathology, University of Pretoria, Pretoria, South Africa

<sup>3</sup>Biochemistry and Molecular Biology, Michigan State University, East Lansing, USA

<sup>4</sup>BioSNTR, South Dakota State University, Brookings, SD, USA

## **\*Correspondences:**

Liping Gu

[Liping.gu@sdstate.edu](mailto:Liping.gu@sdstate.edu)

Ruanbao Zhou

[Ruanbao.zhou@sdstate.edu](mailto:Ruanbao.zhou@sdstate.edu)

Abstract: 254 words

Main text: 6288 words

Figures: 3

Tables: 4

Supplementary Figures: 2

Supplementary Tables: 2

Supplementary Material: 1

## ABSTRACT

1

2 In response to environmental changes, vegetative cells of *Anabaena cylindrica* can  
3 differentiate into two other cell types: a heterocyst for oxic N<sub>2</sub>-fixation, and an enlarged  
4 spore called akinete for stress survival. Akinetes normally differentiate from vegetative  
5 cells adjacent to heterocysts. Heterocysts inhibit nearby cells from differentiating into  
6 heterocysts but can induce adjacent cells to become akinetes, a rare embryogenetic  
7 induction in prokaryotes. The mechanism for a patterned differentiation in *A. cylindrica* has  
8 been little studied. Here, we isolated three types of cells from *A. cylindrica* to identify their  
9 proteomes using LC-MS/MS.

10

11 A total of 1395 proteins were identified, including 664 proteins from akinetes, 751 proteins  
12 from heterocysts, and 1236 proteins from vegetative cells. There were 45 proteins (33 novel  
13 proteins) found exclusive to akinetes, 57 heterocyst-specific proteins (33 novel proteins),  
14 including *nif* gene products, and 485 proteins exclusively in vegetative cells. Our proteomic  
15 data suggest that akinetes, unlike the typical spores of bacteria, perform unique biochemical  
16 functions that collaborate with both heterocysts and vegetative cells. A HAVe model for  
17 collaboration among heterocysts, akinetes and vegetative cells is proposed to illustrate the  
18 metabolic network of cyanophycin and carbohydrates based on the distribution of their  
19 biosynthesis related proteins in three types of cells. Interestingly, cell division proteins,  
20 DNA replication proteins, some carboxysomal proteins including RuBisCO and proteins in  
21 photosystems I, II were found abundant in heterocysts, the non-dividing cells dedicated  
22 exclusively to oxic N<sub>2</sub>-fixation. The identification of the akinete and heterocyst proteomes  
23 enables the pursuit of genetic studies into the patterned differentiation of akinetes and  
24 heterocysts.

25

## 26 KEYWORDS

27 cyanobacteria, spores, oxic nitrogen fixation, comparative proteomics, cellular  
28 differentiation, HAVe model.

## 29 **Introduction**

30

31 Cyanobacteria are the only prokaryotes capable of oxygenic photosynthesis (Gantt, 2011),  
32 and are widely believed to be the ancestors of chloroplasts (Martin et al., 2002). Many  
33 cyanobacteria are also capable of photosynthetic fixing atmospheric dinitrogen (N<sub>2</sub>) (Kumar  
34 et al., 2010a). While some cyanobacteria follow a single-cell lifestyle, multicellularity in  
35 this group first evolved 2.5 billion years ago (Schirrmeyer et al., 2011). Many  
36 cyanobacteria are capable of complex biochemical transformations in response to different  
37 physicochemical environments. Photosynthesis occurs in light and yields oxygen while N<sub>2</sub>  
38 fixation requires a highly reduced environment (Kumar et al., 2010b). Unicellular  
39 cyanobacteria such as *Cyanothece sp.* ATCC 51142 solve this through a circadian clock to  
40 separate photosynthesis and N<sub>2</sub> fixation temporarily into light and dark periods (Cerveny et  
41 al., 2013). Spatial division of labor in multicellular cyanobacteria appears more efficient at  
42 energy capture than temporal separation as occurs in unicellular cyanobacteria (Rossetti et  
43 al., 2010). Some filamentous cyanobacteria can differentiate to form four cell types:  
44 photosynthetic vegetative cells, N<sub>2</sub>-fixing heterocysts, akinetes, and small motile filaments  
45 called hormogonia (Rippka and Herdman, 1985; Flores and Herrero, 2010b). Akinetes  
46 developed from vegetative cells but are capable of germinating to produce young vegetative  
47 cells. Heterocysts develop from vegetative cells to form terminally differentiated, non-  
48 dividing cells functionally specialized for oxic N<sub>2</sub>-fixation. Heterocysts are formed in  
49 filamentous cyanobacteria in response to the depletion of fixed nitrogen (Mitschke et al.,  
50 2011). They develop every 10 to 20 cells along the filament (Kumar et al., 2010b), and are  
51 larger and more round than vegetative cells. The cell envelope of heterocysts is thicker, and  
52 with two additional envelope layers: heterocyst-specific glycolipids (HGL) and an outer  
53 polysaccharide layer (HEP). These extra two envelope layers impede the entry of oxygen  
54 to protect nitrogenase in the heterocysts (Flores and Herrero, 2010a). Heterocysts have  
55 diminished levels of pigments, and photosystem II is degraded to shut down O<sub>2</sub>-producing  
56 reactions (Thomas, 1970; Donze et al., 1972). Thus, the heterocyst creates a micro-oxic  
57 environment to house the oxygen-sensitive nitrogenase. However, photosystem I (PS I) is  
58 kept intact to generate ATP using light energy for N<sub>2</sub>-fixation through cyclic  
59 photophosphorylation (Wolk and Simon, 1969; Tel-Or and Stewart, 1976). Therefore,  
60 nitrogen fixation in heterocysts is a uniquely solar-powered process, which is distinct from  
61 N<sub>2</sub>-fixation by any other N<sub>2</sub>-fixing bacteria. The wall between vegetative cells and  
62 heterocysts contains intercellular channels called septosomes, which allow for exchange of  
63 metabolites. Reductants such as sucrose and fixed carbon are obtained from vegetative cells,  
64 while heterocysts fix N<sub>2</sub> and provide amino acids to the vegetative cells in a filament  
65 (Thomas et al., 1977; Muro-Pastor and Hess, 2012).

66

67 Some cyanobacteria can form akinetes, spore-like cells resistant to desiccation and freezing  
68 temperatures, that are able to germinate into new vegetative cells under favorable conditions  
69 (Perez et al., 2015). Unlike endospores of *Bacillus*, akinetes are susceptible to heat and long-  
70 term exposure to vacuum (Olsson-Francis et al., 2009). Akinetes are larger than vegetative  
71 cells (Singh and Montgomery, 2011) and contain large quantities of reserve products,  
72 mainly glycogen (Sarma et al., 2004) and the nitrogen storage polypeptide polymer  
73 cyanophycin (Sukenik et al., 2015). Akinetes are enveloped in a thick protective coat  
74 (Meeks et al., 2002). They begin to differentiate from vegetative cells during the late

## Proteomics of three cell types

75 exponential phase of growth. Increasing culture density and decreasing light penetration  
76 accelerate the formation of akinetes. Intriguingly akinetes normally form adjacent to  
77 heterocysts in *Anabaena cylindrica* (Figure 1A), implying that these akinetes may play a  
78 role in transportation of N and C between vegetative cells and heterocysts besides their  
79 survival role in stress conditions. The significant morphological and metabolic changes  
80 observed in heterocysts and akinetes suggest unique phenotypes underpinned by complex  
81 regulatory pathways.

82

83 Many genes have been reported to be involved in regulating heterocyst differentiation. HetR  
84 is a master regulator specifically required for heterocyst differentiation (Buikema and  
85 Haselkorn, 1991; Zhou et al., 1998; Huang et al., 2004). Several regulatory genes *nrrA*  
86 (Ehira and Ohmori, 2011), *ccbP* (Hu et al., 2011), *hetN* (Higa et al., 2012), *hetF*, *patA*  
87 (Risser and Callahan, 2008), *patN* (Risser et al., 2012), *patU* (Meeks et al., 2002), *hetZ*  
88 (Zhang et al., 2007), *patS* (Yoon and Golden, 1998; Hu et al., 2015) and *hetP* (Videau et al.,  
89 2016) were also found to play very important roles during heterocyst differentiation and its  
90 pattern formation. The heterocyst-specific NsiR1 small RNA was recently discovered as an  
91 early marker in this process (Muro-Pastor, 2014). Although these genes are clearly involved  
92 in the regulation of heterocyst development, their biochemical functions remain to be  
93 determined. Unfortunately, the genetic regulation of akinete formation is completely  
94 unknown. So far, the only reported akinete-specific protein is AvaK from *Anabaena*  
95 *variabilis* (Zhou and Wolk, 2002). There has been no proteomic study for akinetes to date  
96 although a quantitative shotgun proteomics study of heterocysts was reported for *Anabaena*  
97 *sp.* PCC 7120 (Ow et al., 2008; Pandey et al., 2012; Agrawal et al., 2014; Panda et al., 2014)  
98 and *Nostoc punctiforme* (Liang et al., 2012; Sandh et al., 2014).

99

100 *A. cylindrica* can form N<sub>2</sub>-fixing heterocysts under both depleted and replete nitrate  
101 conditions (Meeks et al., 1983), which is different from other heterocyst forming  
102 cyanobacteria, such as *Anabaena sp.* strain PCC 7120 (Borthakur and Haselkorn, 1989),  
103 *Anabaena variabilis* (Thiel et al., 1995) and *Nostoc punctiforme* (Summers and Meeks,  
104 1996), whose vegetative cells can differentiate into heterocysts only in response to  
105 deprivation of combined nitrogen. Moreover, vegetative cells of *A. cylindrica* can also  
106 differentiate into akinetes (arrowheads labeled A), spore-like cells for stress survival.  
107 Akinetes (15 ~20 μm in length) are about 10 times larger than vegetative cells, and normally  
108 develop adjacent to heterocysts within the same filament (Figure 1A), providing a rare  
109 opportunity to elucidate what appears to be an embryogenetic induction in a prokaryote  
110 (Wolk, 1966). Unfortunately, the differentiation of akinetes, heterocysts as well as akinete  
111 juxtaposition to heterocysts have not heretofore been studied genetically due to the lack of  
112 a genetic transformation method for this organism.

113

114 We sought to characterize the phenotype of akinetes of *A. cylindrica* through proteomic  
115 analysis, contrasting it to the phenotype of heterocysts and vegetative cells. *A. cylindrica*  
116 ATCC 29414 was selected for this study because it differentiates readily into both  
117 heterocysts and akinetes in dilute Allen and Arnon medium (AA/8) without combined  
118 nitrogen (Hu et al., 1981). Its akinetes are large and readily separated from heterocysts and  
119 vegetative cells. Our proteomic data suggest that akinetes, unlike the typical spores of

120 bacteria, perform unique biochemical functions that collaborate with both heterocysts and  
121 vegetative cells.

122

## 123 **Material and Methods**

124

### 125 **Isolation of akinetes and heterocysts**

126 Isolation of akinetes and heterocysts was based upon the CsCl density gradient  
127 centrifugation (Wolk, 1968) with the following modification. Briefly *A. cylindrica* ATCC  
128 29414 was grown in nitrate free AA/8 medium under continuous light ( $60 \mu\text{E}/\text{m}^2/\text{s}$ , 150  
129 rpm,  $30^\circ\text{C}$ ) for 30 days ( $\text{OD}_{700} \approx 0.15$ ) to allow heterocyst and akinete development. Cultures  
130 were harvested ( $6,400 \times g$  15 min,  $4^\circ\text{C}$ ), resuspended in ddH<sub>2</sub>O, and the vegetative cells  
131 were disrupted by passing the suspension through a Nano DeBEE-30 high pressure  
132 homogenizer (BEE International) at 4,500 psi and then at 5,000 psi. Akinetes and  
133 heterocysts were sedimented ( $4,000 \times g$  10 min, and  $4^\circ\text{C}$ ) and washed four times with  
134 ddH<sub>2</sub>O to remove the vegetative cell debris. There were two distinct layers formed in the  
135 last wash pellet. The upper layer was suspended in 1.55 g/mL CsCl density solution, and  
136 transferred into in an ultracentrifugation tube. The bottom layer was suspended in 1.45 g/mL  
137 CsCl and carefully transferred on-top of the upper layer suspension in the same  
138 ultracentrifugation tube. Two distinct fractions were collected from the first CsCl density  
139 gradient centrifugation ( $17,000 \times g$ , 60 min,  $4^\circ\text{C}$  in a fixed angle MLA-55 rotor, Beckman  
140 Coulter), each were sedimented ( $4000 \times g$ , 30 min), and washed with 3x ddH<sub>2</sub>O. The heavy  
141 fraction was suspended in 1.45 g/ml CsCl solution, and re-centrifuged as before. The light  
142 fractions from the first and second centrifugations were pooled, suspended in 1.45 g/ml CsCl  
143 solution, and re-centrifuged. The supernatant fraction from this third centrifugation was  
144 suspended in 1.3 g/ml CsCl solution and re-centrifuged. The resultant pellets from the  
145 second and third centrifugations (containing highly purified akinetes) and pellet from the  
146 4<sup>th</sup> centrifugation (containing highly purified heterocysts) were washed with ddH<sub>2</sub>O as  
147 above. The purity of the heterocysts ( $99.52 \pm 0.48\%$ ) and akinetes ( $96.17 \pm 0.72\%$ ) was  
148 examined by differential interference contrast microscopy (AX70 upright, Olympus).

149

### 150 **Total protein extraction and SDS-PAGE purification**

151 The purified heterocysts or akinetes were suspended in Phosphate Buffered Saline (PBS)  
152 containing 1% N-lauroyl sarcosine and protease Inhibitors [Complete, Mini Protease  
153 Inhibitor Cocktail Tablets (Roche)] at 1 tablet per 10 mL]. Cells were disrupted on ice by  
154 ultra-sonication (Branson digital sonifier 450) for 12 x 5 s bursts with 15 s interval at an  
155 amplitude of 60%. Cell lysates were collected ( $13,000 \times g$  20 min) respectively. To extract  
156 total proteins from the vegetative cells, *A. cylindrica* ATCC 29414 cells grown in AA/8N  
157 (Hu et al., 1981) for 8 days ( $\text{OD}_{700} \approx 0.042$ ) were harvested ( $6,400 \times g$ , 15 min,  $4^\circ\text{C}$ ) and  
158 resuspended in PBS buffer containing 1% N-lauroyl sarcosine and protease inhibitors.  
159 Vegetative-cell lysate was obtained by passing the cell suspension through a Nano DeBEE-  
160 30 High Pressure Homogenizer (BEE International) once at 1,000 psi (only the vegetative  
161 cells were disrupted at this pressure), and removing unbroken cells via centrifugation ( $4,000$   
162  $\times g$ , 10 min,  $4^\circ\text{C}$ ).

163

164 Total proteins from each type of cell lysate were precipitated with 10% trichloroacetic acid  
165 (TCA) overnight at  $4^\circ\text{C}$ , sedimented ( $16,000 \times g$ , 30 min), and washed three times with 80%

166 methanol and three times with 80% acetone. The pellets were resuspended in sodium  
167 dodecyl sulfate-polyacrylamide gel electrophoresis (SDS-PAGE) loading buffer containing  
168 1% N-lauroyl sarcosine, boiled for 3 min, clarified by centrifugation at  $16,000 \times g$  for 20  
169 min at 25°C, and subjected to a 12% SDS-PAGE (Bio-Rad Mini-PROTEAN® Comb, 5-  
170 well, 1.0 mm) at 200 mV for approximately 15 min, until all the proteins just entered the  
171 resolving gel. The gel was stained with Coomassie Brilliant Blue R-250 for band excision  
172 and analysis (Supplementary Figure S1).

173

#### 174 **In-gel tryptic digestion and protein identification by LC-MS/MS**

175 The protein gel bands (Supplementary Figure S1) were excised and in-gel tryptic digestion  
176 was performed according to Shevchenko (Shevchenko et al., 1996) with the following  
177 modifications. Briefly, gel slices were dehydrated with acetonitrile (ACN) for  
178 approximately 5 min incubation and repeated this process until they appear to shrink in size  
179 and show a chalk white color. The time required and number of washes vary with gel size  
180 and composition. The chalk white color gel was then incubated with 100 mM ammonium  
181 bicarbonate ( $\text{NH}_4\text{HCO}_3$ ) containing 10 mM dithiothreitol (DTT,  $\text{pH} \approx 8.0$ ) for 45 min at  
182 56°C, dehydrated again and incubated with 100 mM  $\text{NH}_4\text{HCO}_3$  containing 50 mM  
183 iodoacetamide for 20 min in the dark, and then washed with 100 mM  $\text{NH}_4\text{HCO}_3$  and  
184 dehydrated again. Approximately 50  $\mu\text{L}$  trypsin solution (0.01  $\mu\text{g}/\mu\text{L}$  sequencing grade  
185 modified trypsin (Promega, #V5111) in 50 mM  $\text{NH}_4\text{HCO}_3$ ) was added to each gel slice so  
186 that the gel was completely submerged, and then incubated at 37°C for overnight. The  
187 tryptic peptides were extracted with 60% ACN/1% TCA from the gel by water bath  
188 sonication (Aquasonic 150T sonicating water bath which puts out 135W. Sonication is done  
189 2 x 20s) and concentrated in a SpeedVac to 2  $\mu\text{L}$ .

190

191 For heterocyst and akinete samples, the extracted peptides were re-suspended in 20  $\mu\text{L}$  2%  
192 ACN/0.1% trifluoroacetic acid (TFA), 10  $\mu\text{L}$  were injected by a nanoAcquity Sample  
193 Manager and loaded for 5 min onto a Symmetry C18 peptide trap (5  $\mu\text{m}$ , 180  $\mu\text{m}$  x 20 mm)  
194 (Waters) at 4  $\mu\text{L}/\text{min}$  in 2% ACN/0.1% Formic Acid. The bound peptides were eluted onto  
195 a BH130 C18 column (1.7  $\mu\text{m}$ , 150  $\mu\text{m}$  x 100 mm, Waters) using a nanoAcquity UPLC  
196 (Waters) (Buffer A = 99.9% Water/0.1% Formic Acid, Buffer B = 99.9% Acetonitrile/0.1%  
197 Formic Acid) with a gradient of 5% B to 30% B over 228 min, ramping to 90% B at 229  
198 min and holding for 1 min, and then ramping back to 5% B at 231 min, and holding for  
199 equilibration prior to the next injection for a total run time of 240 min. The eluted peptides  
200 were sprayed into a LTQ-FT-ICR Ultra hybrid mass Spectrometer (Thermo Scientific)  
201 using an ADVANCE nanospray source (Bruker-Michrom). Survey scans were taken in the  
202 FT (25,000 resolution determined at  $m/z$  400) and the top five ions in each survey scan were  
203 then subjected to automatic low energy collision induced dissociation (CID) in the LTQ.

204

205 For the vegetative-cell sample, 5  $\mu\text{L}$  of the extracted peptide suspension was injected (to  
206 the sample loop which is then backflushed using solvent A directly to the column) by  
207 EASYnLC and the peptides separated through an Acclaim PepMap RSLC column (0.075  
208 mm x 150 mm C18, Thermo Scientific) with the same gradient as above. The eluted  
209 peptides were sprayed into a Q Exactive hybrid quadrupole-Orbitrap mass spectrometer  
210 using a Nanospray Flex™ Ion Sources (Thermo Scientific). Survey scans were taken in the  
211 Orbi trap (35,000 resolution determined at  $m/z$  200) and the top ten ions in each survey scan

## Proteomics of three cell types

212 were then subjected to automatic higher energy collision induced dissociation (HCD) with  
213 fragment spectra acquired at 17,500 resolution (by convention this is a dimensionless  
214 measurement).

215  
216 For protein identification, the resulting MS/MS spectra were converted to peak lists using  
217 Mascot Distiller, v2.5.1.0 ([www.matrixscience.com](http://www.matrixscience.com)) and searched against a protein  
218 sequence database containing *A. cylindrica* ATCC 29414  
219 (<http://scorpius.ucdavis.edu/gmod/cgi-bin/site/anabaena02?page=gblast>), *A. cylindrica*  
220 PCC 7122 entries  
221 (<http://www.ncbi.nlm.nih.gov/genome/?term=anabaena+cylindrica+7122+genome>) and  
222 common laboratory contaminants downloaded from [www.thegpm.org](http://www.thegpm.org). All searches  
223 were performed using the Mascot searching algorithm, v 2.4. The Mascot output was then  
224 analyzed using Scaffold, v4.3.4 ([www.proteomesoftware.com](http://www.proteomesoftware.com)) to probabilistically validate  
225 protein identifications at 1% FDR. The quantification value was calculated using  
226 Normalized Total Spectra (For details, see Supplementary Materials). The mass  
227 spectrometry proteomics data have been deposited to the ProteomeXchange 213  
228 Consortium via the PRIDE (Vizcaino et al., 2016) partner repository with the dataset  
229 identifier PXD006041.

230

## 231 Results

232

### 233 Proteomic analysis of heterocysts, akinetes, and vegetative cells

234 To unlock the cellular function of akinetes and the protein network among akinetes,  
235 heterocysts, and vegetative cells in *A. cylindrica* ATCC 29414, we performed proteomics  
236 through LC-MS/MS. A total of 12616 tryptic peptides were collected and 1426 proteins  
237 were identified, including 1395 ORF proteins from *A. cylindrica* ATCC 29414, 14 proteins  
238 from common laboratory contaminants, 14 decoy proteins for determination of the false  
239 discovery rate, and 3 ORFs (Anacy\_0074, Anacy\_3940 and Anacy\_5216) in *A. cylindrica*  
240 PCC 7122 matched to intergenic regions of *A. cylindrica* ATCC 29414 genome  
241 (Supplementary Table S2).

242

243 Our LC-MS/MS proteomics analysis identified 664 proteins from akinetes, 751 from  
244 heterocysts, and 1236 from vegetative cells, with 448 proteins common to all three cell  
245 types. There were 45 akinete-specific (Supplementary Table S1), 57 heterocyst-specific  
246 (Supplementary Table S1), and 485 vegetative cell-specific proteins (Figure 2,  
247 Supplementary Table S2). Interestingly, phycocyanin alpha (ORF: 3613) and beta (ORF:  
248 3614) subunits, allophycocyanin beta subunit (ORF: 1908), phycobilisome protein (ORF:  
249 1909), beta subunit of mitochondrial ATP synthase (ORF: 3788), translation elongation  
250 factor 1A (EF-1A/EF-Tu, ORF: 5853) and ribulose 1,5-bisphosphate carboxylase  
251 (RuBisCO) large (ORF: 6007) and small subunit (ORF: 6009) were among most abundant  
252 proteins in all three cell types.

253

### 254 Nitrogen fixation in heterocysts

255 The *nif* genes encode subunits of nitrogenase for reducing atmospheric N<sub>2</sub> to ammonia.  
256 Other heterocyst-specific genes encode proteins involved in regulating heterocyst  
257 development and N<sub>2</sub> fixation, and inactivation of these genes showed diminished or ceased

258 diazotrophic growth in the presence of oxygen due to impaired nitrogenase activity, or  
259 forming no or dysfunctional heterocysts (Lechno-Yossef et al., 2011). The above genes are  
260 collectively called ‘FOX’ genes (incapable of N<sub>2</sub>-fixation in the presence of oxygen)  
261 (Lechno-Yossef et al., 2011). LC-MS/MS identified 27 FOX proteins (Table 1) and 57  
262 heterocyst-specific proteins (Supplementary Table S1). Heterocysts had 19 Fox proteins but  
263 eleven were also found in akinetes (Table 1).

264

### 265 **Distinct distribution of Photosystem I and II proteins**

266 PS I and PS II are well-known hallmarks primarily associated with the photosynthetic  
267 characteristics of vegetative cells. Of 20 photosystem proteins identified, all were present  
268 in vegetative cells, consistent with vegetative cells bearing both PS I and PS II proteins for  
269 fully functional photosynthesis and electron transfer (Table 1). The protochlorophyllide  
270 reductase subunit N catalyzing the penultimate step of chlorophyll biosynthesis (Yamazaki  
271 et al., 2006), PS I assembly protein Ycf3 (Wilde et al., 2001), and PS II reaction center  
272 Psb28 protein (Dobakova et al., 2009) were unique to vegetative cells of *A. cylindrica*.  
273 Notably, there were several PS I and PS II proteins in high abundance in both akinetes and  
274 heterocysts respectively (Table 1), e.g., PS I P700 apoprotein A2, PS II 44 kDa subunit  
275 reaction center protein, and PS II chlorophyll-binding protein CP47, suggesting that PS I  
276 and PS II may function partially in both heterocysts and akinetes.

277

### 278 **Akinete-specific protein AcaK43 (ORF: 1647) in *A. cylindrica***

279 The first reported akinete-specific protein was AvaK from *Anabaena variabilis* (Zhou and  
280 Wolk, 2002). AvaK homolog AcaK43 (ORF: 1647) was among the top 20 most abundant  
281 proteins in *A. cylindrica* akinetes (85.25 counts) and heterocysts (90.73 counts), while only  
282 trace amount was detected in vegetative cells, which is consistent with the previous report  
283 in *A. variabilis* that AvaK is an akinete marker protein (Zhou and Wolk, 2002). However,  
284 our proteomic data showed that AcaK43 was abundant in heterocysts of *A. cylindrica*.  
285 Fluorescence of GFP (green fluorescent protein) from P<sub>acaK43</sub>-gfp (promoter of *acaK43*  
286 fused to *gfp*) originates primarily in both akinetes and heterocysts of *A. cylindrica* (Zhou et  
287 al, unpublished observation). Furthermore, proteins homologous to AapN, Hap, Aet  
288 identified as akinete-specifically expressed genes using differential display at mRNA level  
289 in *Nostoc punctiforme* (Argueta et al., 2006) were below the limit of detection in our  
290 proteomic study. The presence of AcaK43 in both akinetes and heterocysts suggest that *A.*  
291 *cylindrica* is distinct from *A. variabilis* and *N. punctiforme* although they all are  
292 akinete/heterocyst-forming cyanobacteria.

293

### 294 **DNA/RNA/protein biosynthesis patterns among akinetes, heterocysts, and vegetative**

295 LC-MS/MS identified a number of proteins related to nucleotide synthesis, DNA packing  
296 and repair, RNA and protein synthesis, and cell division within akinetes (Table 2).  
297 Nucleotide synthesis related protein (phosphoribosylformylglycinamide synthase II) was  
298 found to be akinete-specific. Although DNA polymerases, single-strand binding protein  
299 (SSBP) and DEAD/DEAH box helicase domain-containing protein involved in DNA  
300 replication were not detected in akinetes, DNA gyrase subunit A and the DNA gyrase  
301 modulator Peptidase U62 were only found in akinetes. Akinetes have more chromosome  
302 copies per cell than in vegetative cells (Sukenic et al., 2012), so DNA gyrase might play an  
303 important role in DNA wrapping and packaging (Gore et al., 2006). Furthermore, DNA



## Proteomics of three cell types

304 gyrase in akinetes may minimize the potential damage caused by light energy to these  
305 resting cells (Napoli et al., 2004). Moreover, a similar distribution pattern of DNA  
306 replication proteins was seen in heterocysts.

307

308 DNA-directed RNA polymerase subunits alpha-, beta, beta' and gamma were abundant in  
309 akinetes. However some proteins required for transcription (like RNA polymerase sigma  
310 factor) and translation (like signal recognition particle protein, some tRNA and ribosomal  
311 proteins) were only found in heterocysts and vegetative cells (Table 2), suggesting a very  
312 active transcription and translation occurred in heterocysts and vegetative cells. Thirteen  
313 out of 25 tRNA synthetases and 23 out of 50 ribosomal proteins were absent in akinetes.  
314 Most transcriptional regulators were also undetectable in akinetes. These data imply that  
315 akinetes retain a less active transcription machinery and a very weak translational capability.

316

317 The proteomics data showed that amidohydrolase 2 (ORF: 3947) and taurine catabolism  
318 dioxygenase TauD/TfdA (ORF: 3933) were the third and fifth most abundant akinete-  
319 specific proteins, while the other two amidohydrolases were vegetative cell-specific (Table  
320 2). TauD/TfdA, which can degrade taurine and be a source of sulfur (Shen et al., 2007), was  
321 found in akinetes as well. However, phosphoadenylylsulfate reductase, involved in sulfur  
322 (Wang et al., 2004) and pyrimidine metabolism ([http://www.genome.jp/kegg-  
323 bin/show\\_pathway?ec00240+1.8.1.9](http://www.genome.jp/kegg-bin/show_pathway?ec00240+1.8.1.9)), was absent in akinetes. Certain enzymes involved  
324 in amino acid metabolism were only found in heterocysts and/or vegetative cells, such as  
325 arginine (Arg) biosynthetic enzyme, acetylglutamate kinase (Ramon-Maiques et al., 2002),  
326 and lysine biosynthetic enzyme diaminopimelate epimerase (Hor et al., 2013). Interestingly,  
327 saccharopine dehydrogenase required for lysine degradation (Serrano et al., 2012) was only  
328 present in akinetes.

329

### 330 Cell division

331 Heterocysts, terminally differentiated N<sub>2</sub>-fixing cells, do not divide and need not pass DNA  
332 information to the next generation, which is consistent with the absence of key DNA  
333 replication enzymes (DNA polymerase) in heterocysts. Similarly, no DNA polymerases  
334 were detected in akinetes, suggesting that akinetes are not dividing either. Akinetes of *A.*  
335 *cylindrica* store twice as much DNA and 10-fold more protein than vegetative cells (Simon,  
336 1977), preparing them for germination when environmental conditions become favorable.  
337 Surprisingly, septum formation protein Maf (Briley et al., 2011), participating in cell  
338 division in *Bacillus subtilis*, was found to be heterocyst-specific. Cell division protein FtsZ  
339 (Bi and Lutkenhaus, 1990) and septum site-determining protein MinD (Maurya et al., 2016)  
340 were more abundant in heterocysts and akinetes than in vegetative cells (Table 3). We  
341 speculated that, instead of involvement in cell division, these proteins might be critical in  
342 maintaining septum homeostasis among heterocysts, akinetes, and vegetative cell.

343

### 344 Heterocyst-specific envelope glycolipid and lipopolysaccharide lipid A

345 Cyanobacterial heterocysts provide a micro-oxic environment to support the oxygen-labile  
346 nitrogenase fixing N<sub>2</sub> in an oxic milieu. The heterocyst glycolipid (HGL) layer is an  
347 important part of the system for maintaining a micro-oxic environment in heterocysts  
348 (Murry and Wolk, 1989). Our proteomics study identified multiple heterocyst-specific  
349 proteins required for synthesis, export, and deposition of envelope polysaccharides and

350 glycolipids (Table 3). For instance, we found polyketide synthase thioester reductase  
351 subunit HglB (Fan et al., 2005), an enzyme for synthesizing glycolipid aglycones. DevA  
352 and DevB are two components of DevBCA exporter (Fiedler et al., 1998) necessary for the  
353 formation of the laminated layer of heterocysts (Zhou and Wolk, 2003). Hexapeptide  
354 repeat-containing transferase is a sugar transferase which might play a critical role in  
355 synthesizing different sugars from the fixed carbon source provided by adjacent vegetative  
356 cells (Vaara, 1992). Furthermore, glycosyl transferase (HglT, ORF: 3521) required to  
357 glycosylate the glycolipid aglycone (Awai and Wolk, 2007) was present only in heterocysts  
358 and akinetes (Table 3). ORF: 2637 and ORF: 2638, orthologs of LpcC and Omp85 involved  
359 in lipopolysaccharide lipid A biosynthesis to form a permeability barrier at the outer  
360 membrane (Nicolaisen et al., 2009), had different distribution, with high abundance of  
361 Omp85 in akinetes, supporting the hypothesis that the lipopolysaccharide layer plays an  
362 important role in increasing stress tolerance of akinetes in *A. cylindrica*.

363

### 364 **S-layer proteins and ATP-binding cassette (ABC) transporter**

365 The *A. cylindrica* genome encodes seven S-layer domain-containing proteins  
366 (Supplementary Figure S2) and two S-layer like proteins. S-layer proteins can be self-  
367 assembled to form an array on the surface of the cell (Smarda et al., 2002). They have  
368 multiple functions, including the maintenance of cell integrity, a permeability barrier,  
369 pathogenesis, and immune response (Germino et al., 2015). Our LC-MS/MS identified all  
370 nine S-layer proteins (Table 3). Most S-layer proteins, e.g., all4499 and alr4550 (Oliveira  
371 et al., 2015), along with other extracellular proteins, such as FG-GAP repeat-containing  
372 protein HesF (Oliveira et al., 2015) (Table 3), have been identified as exoproteins. The  
373 abundance of these nine S-layer proteins was different, with one S-layer protein (ORF: 1127)  
374 unique to akinetes, and two other S-layer proteins (ORF: 5127 and ORF: 2780) absent in  
375 vegetative cells (Table 3), implying unique functionality associated to different cell types.

376

### 377 **Polysaccharide and Peptidoglycan in cyanobacterial cell wall**

378 We identified a total of 17 proteins involved in peptidoglycan and lipopolysaccharides (LPS)  
379 formation, among them, 7, 10, and 16 proteins related to peptidoglycan and  
380 lipopolysaccharides were found in akinetes, heterocysts and vegetative cells, respectively  
381 (Table 3). Most cyanobacteria have an additional polysaccharide layer in the cell envelope  
382 (Cardemil and Wolk, 1976; 1979). S-layer proteins are anchored to the cell surface through  
383 non-covalent interactions with cell surface structures, usually containing LPS (Gandham et  
384 al., 2012). UDP-glucose/GDP-mannose dehydrogenase, which takes part in the synthesis of  
385 LPSs (Muszynski et al., 2011) was found in heterocysts and vegetative cells, but absent in  
386 akinetes. Notably, orthologs of Alr2887 (ORF: 153) involved in heterocyst-specific  
387 glycolipid export and All4388 (ORF: 1651) involved in heterocyst envelope polysaccharide  
388 deposition (Maldener et al., 2003) were shown more abundant in akinetes and heterocysts  
389 (Table 3), suggesting a role in envelope formation of heterocysts and akinetes.

390

### 391 **Glycogen serves as a form of energy storage**

392 Glycogen is a multibranched polymer of glucose serving as the major carbon storage in  
393 cyanobacteria (Diaz-Troya et al., 2014). Glycogen biosynthesis is coupled to photosynthesis,  
394 and its conversion into glucose in the dark is necessary to maintain cell metabolism. ADP-  
395 glucose pyrophosphorylase (AGP) and glycogen synthase are required for synthesis of

396 glycogen. Interestingly, glycogen synthase was highly abundant in akinetes and rare in  
397 vegetative cells. Neither akinetes nor heterocysts contained the five proteins involved in  
398 glycogen degradation (Table 4).

399

#### 400 **Cyanophycin and $\beta$ -aspartyl-arginine**

401 Cyanophycin (CpG), or multi-L-arginyl-poly-L-aspartic acid granule polypeptide, is a non-  
402 ribosomally produced amino acid polymer composed of an aspartic acid (Asp) backbone  
403 and Arg side groups. In heterocysts, nitrogenase converts  $N_2$  to ammonia and then forms  
404 glutamine (Gln). Gln can serve as ammonium donor for synthesis of Asp by aspartate  
405 aminotransferase, also known as glutamic oxaloacetic transaminase (Xu et al., 2015). Gln  
406 is also the precursor for biosynthesis of Arg and proteins involved in Arg biosynthesis, and  
407 it was found in high amount in heterocysts, such as acetylglutamate kinase (Huang et al.,  
408 2015; Minaeva et al., 2015), ArgL (ORF: 1480) (Leganes et al., 1998), and nitrogen  
409 regulatory protein P-II GlnB (ORF: 3400) (Llacer et al., 2007; Paz-Yepes et al., 2009)  
410 (Table 4). Asp and Arg are further condensed by cyanophycin synthetase into CpG (Ziegler  
411 et al., 1998). This nitrogen storage molecule can be degraded by cyanophycinase (Picossi  
412 et al., 2004) to produce  $\beta$ -aspartyl-arginine. Cyanophycin synthetase was below the limit of  
413 detection in heterocysts, but all three putative cyanophycinases in the *A. cylindrica* genome  
414 were present in high amounts (Table 4), supporting a previous finding that cyanophycinase  
415 activity is high in heterocysts (Gupta and Carr, 1981). Asp and Arg can also be transported  
416 into akinetes for further condensation into CpG by cyanophycin synthetase (ORF: 1510)  
417 and stored. CpG can be degraded by cyanophycinase (ORF: 1272) (Table 4) to support  
418 growth of other cells in the filament and/or germination in a favorable environment.

419

#### 420 **Sucrose as a reducing power for $N_2$ fixation and compatible solute**

421 Sucrose, a universal vehicle of reduced carbon in plants, appears to have a similar role  
422 within the diazotrophic cyanobacterial filament (Kolman et al., 2015). Sucrose synthesized  
423 by sucrose phosphate synthase and sucrose phosphate phosphatase (SPP) is believed to  
424 occur in *Anabaena* strains (Cumino et al., 2002). Sucrose is then transported into  
425 heterocysts (Juttner, 1983) and further hydrolyzed by a specific invertase (InvB) (Lopez-  
426 Igual et al., 2010; Vargas et al., 2011). The bidirectional enzyme sucrose synthase SuS-A,  
427 on the other hand, exhibited optimal activity at pH 7.5-8.2 in the sucrose-synthesis direction  
428 and at pH 5.9-6.5 in the reverse direction (Porchia et al., 1999). Our proteomic data  
429 identified SPP (ORF: 3842) (Cumino et al., 2001) present in heterocysts and vegetative  
430 cells, but not in akinetes. More strikingly, we detected both SuS-A (ORF: 3602) and SuS-  
431 B (ORF: 4634) in high amount, but no invertase in akinetes. Invertase in heterocysts was  
432 below the limit of detection in heterocysts. We speculated that the high amount of sucrose  
433 synthase present in akinetes might be involved in breaking down sucrose transported from  
434 vegetative cells for synthesizing reserve glycogen (Perez et al., 2016), polysaccharides to  
435 build akinete envelope, and/or for synthesizing trehalose as an osmoprotectant (Sakamoto  
436 et al., 2009) by akinete-specific malto-oligosyltrehalose synthase (ORF: 238) orthologous  
437 to AII0167 (Higo et al., 2006). Trehalose may play a role in long-term survival of akinetes  
438 under dry conditions.

439

#### 440 **Discussion**

441

## Proteomics of three cell types

442 Some filamentous cyanobacteria can differentiate nitrogen-fixing cells called heterocysts.  
443 Normally 2 ~ 10% of vegetative cells develop into heterocysts. In *A. cylindrica*, vegetative  
444 cells adjoining heterocysts develop into akinetes (Figure 1A). The vegetative cells capture  
445 sunlight energy to fix CO<sub>2</sub> and heterocysts carry out solar-powered N<sub>2</sub>-fixation. Although  
446 akinetes are known as spore-like structures for survival under unfavorable condition, our  
447 proteomic data indicate that akinetes may also play an active role during filamentous growth.  
448 Based on the distribution of cyanophycin, glycogen and sucrose biosynthesis-related  
449 proteins, a putative network for fixed nitrogen and carbohydrate among Heterocysts,  
450 Akinetes and Vegenerative cells, or designated HAVE model, is proposed for *A. cylindrica*  
451 (Figure 3). This is the first comprehensive comparison of proteins of akinetes, heterocysts  
452 and vegetative cells of *A. cylindrica*. These findings support new insight into the metabolic  
453 differences and increase our understanding of the roles played by these three very different  
454 but adjacent cells. The distinct distribution of FOX proteins, PS I & II proteins, and AcaK43  
455 in heterocysts, vegetative cells, and akinetes, respectively, is consistent with previous  
456 findings, supporting the reliability of our proteomic data. Only the RuBisCO results (Table  
457 S2) are inconsistent with the previous observations. We observed high abundance of  
458 RuBisCO large and small subunits, and some carboxysomal microcompartment proteins  
459 (CcmN, CcmM, ORFs: 2671-2672) in all three cell types (Table S2, (Cameron et al., 2013)).  
460 However, Cossar et al. reported that RuBisCO protein was undetectable in mature  
461 heterocysts of *A. cylindrica* (Cossar et al., 1985). Several lines of evidence from *Anabaena*  
462 strain PCC 7120 have shown that promoter activity of RuBisCO was barely detected in  
463 heterocysts using P<sub>rbcLS</sub>-luxAB as a reporter (Elhai and Wolk, 1990), and RuBisCO large  
464 and small subunit transcripts were not detected in heterocysts by *in situ* hybridization  
465 (Madan and Nierzwicki-Bauer, 1993). Whether RuBisCO plays a role in both heterocysts  
466 and akinetes of *A. cylindrica* remains to be further investigated.

467

468 The proteome of vegetative cells confirmed much of what is known about these workhorses.  
469 The large complement of PS I and PS II proteins supported active photosynthesis while  
470 RuBisCO, carboxysomal proteins, and other enzymes of the Calvin cycle supported carbon  
471 fixation. The glucose and fructose produced is likely synthesized into sucrose in vegetative  
472 cells and then supplied to the adjoining akinetes and heterocysts as primary energy and  
473 carbon source (Figure 3). The HAVE model was supported by the findings of carbohydrate  
474 related proteins in this proteomics study. In vegetative cells, fructose 6-phosphate is  
475 generated via the Calvin cycle during photosynthesis, which is then converted to sucrose by  
476 sucrose-phosphate synthase (SPS) and sucrose-phosphate phosphatase (SPP) (Cumino et  
477 al., 2002). Sucrose can be broken down by invertase in vegetative cells, or transported to  
478 akinetes where sucrose is cleaved into glucose and fructose, serving as building blocks for  
479 other carbohydrate biosynthesis, e.g., peptidoglycan, lipopolysaccharide, and glycolipid as  
480 envelope materials; glycogen storage molecules; and/or trehalose osmoprotectant. The  
481 paucity of FOX proteins along with key components of nitrogenase such as NifD, NifN and  
482 NifU not detected supported absence of nitrogen fixation. The FOX protein, Histone-like  
483 DNA binding protein HanA was most abundant in vegetative cells, consistent with  
484 observations that a strong HanA-GFP fluorescent signal co-localized with DNA in  
485 vegetative cells (Lu et al., 2014). A HanA mutant exhibited slow growth, altered  
486 pigmentation, and inability to differentiate heterocysts (Khudyakov and Wolk, 1996). FOX  
487 proteins unique to vegetative cells included trace amount of HepN (Lechno-Yossef et al.,

*Proteomics of three cell types*

488 2006), InvA, FraG, PrpI, NifU-like, DevR (Campbell et al., 1996), and H6L region  
489 containing protein (ORF: 2881). Vegetative cells obtain fixed nitrogen from either  
490 heterocysts or adjoining akinetes in the form of  $\beta$ -aspartyl-arginine.  $\beta$ -aspartyl-arginine is  
491 further degraded into Asp and Arg by isoaspartyl dipeptidase (ORF: 4256) in vegetative  
492 cells (Table 4, (Burnat et al., 2014)). Asp and Arg in turn serve as precursors for the  
493 biosynthesis of other amino acids and nucleotides, the building blocks for DNA, RNA, and  
494 protein biosynthesis. Vegetative cells contained abundant enzymes for nucleotide and  
495 amino acid biosynthesis. Forty-nine out of 50 ribosomal proteins and translation factors  
496 were found in vegetative cells as well. These data suggest that DNA, RNA, and protein  
497 biosynthesis occurs actively in vegetative cells to maintain their cellular function and cell  
498 division.

499

500 The heterocyst proteome supported what is known about these specialized cells, but also  
501 indicated some novel functions. Heterocysts contained all the proteins required for nitrogen  
502 fixation, including several proteins absent in akinetes and vegetative cells (Table 1, S1).  
503 These included nitrogenase molybdenum-iron protein NifN (Hu et al., 2010), the Fe-S  
504 cluster scaffold protein NifU that facilitates functional expression of nitrogenase in  
505 heterocysts (Nomata et al., 2015), and DevA required for heterocyst maturation (Maldener  
506 et al., 1994). Nitrogenase iron protein NifH (Mevarech et al., 1980) had high abundance in  
507 heterocysts, but was barely detected in vegetative cells and undetectable in akinetes (Table  
508 1). Thus, the distribution of both Nif and Fox proteins indicated that  $N_2$ -fixation only  
509 occurred in heterocysts. Ammonia produced by nitrogenase is incorporated into glutamine  
510 (Gln), serving as ammonia donor to Asp and Arg. Asp and Arg are condensed by  
511 cyanophycin synthetase into cyanophycin in heterocysts (Burnat et al., 2014). The high  
512 levels of three cyanophycinases in heterocysts (Table 4) indicate that the bulk of fixed  
513 nitrogen is then available as  $\beta$ -aspartyl-arginine, a nitrogen vehicle to be transferred  
514 intercellularly to be either hydrolyzed into Asp and Arg in the vegetative cells, or condensed  
515 into storage cyanophycin granule by cyanophycin synthetase in adjoining akinetes. All but  
516 three photosystem proteins occurred in heterocysts. The abundance of several PS I and PS  
517 II proteins implied at least partial functioning of PS I and PS II (Table 1). Generation of  
518 oxygen ( $O_2$ ) through PS II runs counter to the reductive process of nitrogenase. Nitrogenase  
519 is very sensitive to oxygen ( $O_2$ ), so the heterocysts must create a micro-oxic environment.  
520 Cytochrome C oxidase subunit II is the last enzyme in the respiratory electron transport  
521 chain. Valladares et al. showed that Cox2 and Cox3 transcription was up-regulated in  
522 heterocysts after nitrogen step-down in an NtcA- and HetR-dependent manner, and  
523 inactivation of both coxB2 and coxA3 results in the inability of *Anabaena* sp. PCC 7120 to  
524 grow diazotrophically under aerobic conditions (Valladares et al., 2003). Consistent with  
525 their observation, CoxB3 was found in akinetes and heterocysts, and CoxB2 was only found  
526 in heterocysts (Table 1). Taken together, as cytochrome C oxidase has high affinity to  
527 oxygen, it may play a role of consuming residual oxygen in heterocysts, and keeping  
528 nitrogenase in its active state. The high abundance of RuBisCO in heterocysts may play a  
529 role in removing residual oxygen by oxidizing Ribulose 1,5-bisphosphate into 3-PGA and  
530 2-phosphoglycolic acid (Eisenhut et al., 2008). Flavodiiron protein Flv3B (ORF: 1739,  
531 homolog of all0178) was identified to be abundant in heterocysts (Table S2), which may  
532 also be responsible for light-induced  $O_2$  uptake in heterocysts to protect nitrogenase activity  
533 (Ermakova et al., 2014).

*Proteomics of three cell types*

534

535 The key DNA replication proteins (DNA polymerases, SSBP) were not detected in  
536 heterocysts, consistent with terminal nature of the cells (Table 2). However, the presence of  
537 gyrase and helicase might play an important role in DNA rearrangement observed in  
538 heterocysts (Golden et al., 1985). Like vegetative cells, heterocysts contained a broad  
539 spectrum of proteins involved with transcription and translation. Heterocysts are encased in  
540 a thick envelope to supply a micro-oxic environment for protection of nitrogenase.  
541 Proteomic data indicated a number of heterocyst-specific proteins for synthesis, export, and  
542 external assembly of envelope polysaccharides and glycolipids (Table 3). Heterocysts were  
543 also decorated with six of the seven S-layer secretion proteins in Gram-negative species.  
544 Secretion relies on specific ATP-binding cassette (ABC) transporters and an outer membrane  
545 pores (Awram and Smit, 1998; Kawai et al., 1998). Heterocysts had several more ABC  
546 transporters (14) than did akinetes (7) or vegetative cells (10) (Table 3). The differential  
547 compositions of S-layer proteins and ABC transporters in the three cell types may contribute  
548 to the differences in cell envelope structure, including the greater resistance to cell  
549 disruption of heterocysts and also akinetes.

550

551 Akinetes appear to play a role as nitrogen and carbon storage cum transfer unit in filaments  
552 of *A. cylindrica* (Figure 3). By this model fixed carbon enters into akinetes from vegetative  
553 cells and is converted to glycogen by glycogen synthase, or into trehalose for  
554 osmoprotection during the survival stage. Heterocysts flanked by akinetes on both sides  
555 would then obtain carbon for energy via akinetes. Similarly akinetes receive  $\beta$ -aspartyl-  
556 arginine from heterocysts. This dipeptide is then either converted to cyanophycin for  
557 temporary or long-term storage, or transferred to the adjoining vegetative cells to support  
558 the growing chain. Our proteomic data also indicated that akinetes have less active  
559 transcriptional and translational machinery. Importantly, proteomic data indicated a cell  
560 envelope that was different to those of vegetative cells or heterocysts. Akinetes were  
561 decorated with all seven S-layer proteins detected. The suite of peptidoglycan synthesizing  
562 machinery and cell wall hydrolases differed (Table 2), as did the complement of membrane  
563 transporters and enzymes involved in polysaccharide structures. It is worthy to note that  
564 ORF2780 protein, homologous to carbohydrate-selective porins (OprB), functions as a  
565 sugar porin responsible for the optimal uptake of both fructose and glucose in *Nostoc*  
566 punctiforme ATCC 29133 (Ekman et al., 2013). The distinct distribution of OprB in  
567 akinetes and heterocysts at high abundance suggests a role in sugar uptake in these  
568 differentiated cells, consistent with the previous observation of carbon movement from  
569 vegetative cells to heterocysts of *A. cylindrica* (Wolk, 1968), which might also be true of  
570 carbon movement from vegetative cells to akinetes.

571

572 Akinetes have been viewed as spore like cells with the role of species survival under drought  
573 conditions. Their location between nitrogen-fixing heterocysts and carbon-fixing vegetative  
574 cells, combined with high levels of cyanophycin synthetase, cyanophycinase, sucrose  
575 synthetase, and glycogen synthetase suggests a critical role for akinetes during growth of *A.*  
576 *cylindrica* as demonstrated by the HAVe model. The role of the various genes and their  
577 regulation, as well as metabolite exchange among akinetes and their adjoining heterocysts  
578 and vegetative cells will need to be investigated in future work.

579

580

581 **Author Contributions**

582

583 YQ, LG, and RZ designed the work. YQ, LG, MH, DW and RZ performed the experiments.

584 YQ, LG, VB, DW, and RZ analyzed the proteomic data and drafted the manuscript. YQ,

585 LG, VB, DW, MH and RZ revised the manuscript and responsible for final approval of the

586 version to be published. All authors agree to be accountable for the content of the work.

587 **REFERENCES**

588

- 589 Agrawal, C., Sen, S., Singh, S., Rai, S., Singh, P.K., Singh, V.K., and Rai, L.C. (2014).  
590 Comparative proteomics reveals association of early accumulated proteins in  
591 conferring butachlor tolerance in three N(2)-fixing *Anabaena* spp. *J*  
592 *Proteomics* 96, 271-290.
- 593 Argueta, C., Yuksek, K., Patel, R., and Summers, M.L. (2006). Identification of *Nostoc*  
594 punctiforme akinete-expressed genes using differential display. *Mol*  
595 *Microbiol* 61, 748-757.
- 596 Awai, K., and Wolk, C.P. (2007). Identification of the glycosyl transferase required  
597 for synthesis of the principal glycolipid characteristic of heterocysts of  
598 *Anabaena* sp. strain PCC 7120. *FEMS Microbiol Lett* 266, 98-102.
- 599 Awram, P., and Smit, J. (1998). The *Caulobacter crescentus* paracrystalline S-layer  
600 protein is secreted by an ABC transporter (type I) secretion apparatus. *J*  
601 *Bacteriol* 180, 3062-3069.
- 602 Bi, E., and Lutkenhaus, J. (1990). FtsZ regulates frequency of cell division in  
603 *Escherichia coli*. *J Bacteriol* 172, 2765-2768.
- 604 Borthakur, D., and Haselkorn, R. (1989). Nucleotide sequence of the gene encoding  
605 the 33 kDa water oxidizing polypeptide in *Anabaena* sp. strain PCC 7120 and  
606 its expression in *Escherichia coli*. *Plant Molecular Biology Reporter* 13, 427-  
607 439.
- 608 Briley, K., Jr., Prepiak, P., Dias, M.J., Hahn, J., and Dubnau, D. (2011). Maf acts  
609 downstream of ComGA to arrest cell division in competent cells of *B. subtilis*.  
610 *Mol Microbiol* 81, 23-39.
- 611 Buikema, W.J., and Haselkorn, R. (1991). Characterization of a gene controlling  
612 heterocyst differentiation in the cyanobacterium *Anabaena* 7120. *Genes Dev*  
613 5, 321-330.
- 614 Burnat, M., Herrero, A., and Flores, E. (2014). Compartmentalized cyanophycin  
615 metabolism in the diazotrophic filaments of a heterocyst-forming  
616 cyanobacterium. *Proc Natl Acad Sci U S A* 111, 3823-3828.
- 617 Cameron, J.C., Wilson, S.C., Bernstein, S.L., and Kerfeld, C.A. (2013). Biogenesis of a  
618 bacterial organelle: the carboxysome assembly pathway. *Cell* 155, 1131-  
619 1140.
- 620 Campbell, E.L., Hagen, K.D., Cohen, M.F., Summers, M.L., and Meeks, J.C. (1996). The  
621 devR gene product is characteristic of receivers of two-component  
622 regulatory systems and is essential for heterocyst development in the  
623 filamentous cyanobacterium *Nostoc* sp. strain ATCC 29133. *J Bacteriol* 178,  
624 2037-2043.
- 625 Cardemil, L., and Wolk, C.P. (1976). The polysaccharides from heterocyst and spore  
626 envelopes of a blue-green alga. Methylation analysis and structure of the  
627 backbones. *J Biol Chem* 251, 2967-2975.
- 628 Cardemil, L., and Wolk, C.P. (1979). The polysaccharides from heterocyst and spore  
629 envelopes of a blue-green alga. Structure of the basic repeating unit. *J Biol*  
630 *Chem* 254, 736-741.



- 631 Cervený, J., Sinetová, M.A., Valledor, L., Sherman, L.A., and Nedbal, L. (2013).  
632 Ultradian metabolic rhythm in the diazotrophic cyanobacterium *Cyanothece*  
633 sp. ATCC 51142. *Proc Natl Acad Sci U S A* 110, 13210-13215.
- 634 Cossar, J.D., Rowell, P., Darling, A.J., Murray, S., Codd, G.A., and Stewart, W.D.P.  
635 (1985). Localization of ribulose 1,5-bisphosphate carboxylase/oxygenase in  
636 the N-fixing cyanobacterium *Anabaena cylindrica*. *FEMS Microbiology*  
637 *Letters* 28, 65-68.
- 638 Cumino, A., Curatti, L., Giarrocco, L., and Salerno, G.L. (2002). Sucrose metabolism:  
639 *Anabaena* sucrose-phosphate synthase and sucrose-phosphate phosphatase  
640 define minimal functional domains shuffled during evolution. *FEBS Lett* 517,  
641 19-23.
- 642 Cumino, A., Ekeröth, C., and Salerno, G.L. (2001). Sucrose-phosphate phosphatase  
643 from *Anabaena* sp. strain PCC 7120: isolation of the protein and gene  
644 revealed significant structural differences from the higher-plant enzyme.  
645 *Planta* 214, 250-256.
- 646 Diaz-Troya, S., Lopez-Maury, L., Sanchez-Riego, A.M., Roldan, M., and Florencio, F.J.  
647 (2014). Redox regulation of glycogen biosynthesis in the cyanobacterium  
648 *Synechocystis* sp. PCC 6803: analysis of the AGP and glycogen synthases. *Mol*  
649 *Plant* 7, 87-100.
- 650 Dobakova, M., Sobotka, R., Tichý, M., and Komenda, J. (2009). Psb28 protein is  
651 involved in the biogenesis of the photosystem II inner antenna CP47 (PsbB)  
652 in the cyanobacterium *Synechocystis* sp. PCC 6803. *Plant Physiol* 149, 1076-  
653 1086.
- 654 Donze, M., Haveman, J., and Schiereck, P. (1972). Absence of photosystem 2 in  
655 heterocysts of the blue-green alga *Anabaena*. *Biochim Biophys Acta* 256, 157-  
656 161.
- 657 Ehira, S., and Ohmori, M. (2011). NrrA, a nitrogen-regulated response regulator  
658 protein, controls glycogen catabolism in the nitrogen-fixing cyanobacterium  
659 *Anabaena* sp. strain PCC 7120. *J Biol Chem* 286, 38109-38114.
- 660 Eisenhut, M., Ruth, W., Haimovich, M., Bauwe, H., Kaplan, A., and Hagemann, M.  
661 (2008). The photorespiratory glycolate metabolism is essential for  
662 cyanobacteria and might have been conveyed endosymbiotically to plants.  
663 *Proc Natl Acad Sci U S A* 105, 17199-17204.
- 664 Ekman, M., Picossi, S., Campbell, E.L., Meeks, J.C., and Flores, E. (2013). A *Nostoc*  
665 punctiforme sugar transporter necessary to establish a Cyanobacterium-  
666 plant symbiosis. *Plant Physiol* 161, 1984-1992.
- 667 Elhai, J., and Wolk, C.P. (1990). Developmental regulation and spatial pattern of  
668 expression of the structural genes for nitrogenase in the cyanobacterium  
669 *Anabaena*. *EMBO J* 9, 3379-3388.
- 670 Ermakova, M., Battchikova, N., Richaud, P., Leino, H., Kosourov, S., Isojarvi, J., Peltier,  
671 G., Flores, E., Cournac, L., Allahverdiyeva, Y., and Aro, E.M. (2014). Heterocyst-  
672 specific flavodiiron protein Flv3B enables oxic diazotrophic growth of the  
673 filamentous cyanobacterium *Anabaena* sp. PCC 7120. *Proc Natl Acad Sci U S A*  
674 111, 11205-11210.

- 675 Fan, Q., Huang, G., Lechno-Yossef, S., Wolk, C.P., Kaneko, T., and Tabata, S. (2005).  
676 Clustered genes required for synthesis and deposition of envelope glycolipids  
677 in *Anabaena* sp. strain PCC 7120. *Mol Microbiol* 58, 227-243.
- 678 Fiedler, G., Arnold, M., Hannus, S., and Maldener, I. (1998). The DevBCA exporter is  
679 essential for envelope formation in heterocysts of the cyanobacterium  
680 *Anabaena* sp. strain PCC 7120. *Mol Microbiol* 27, 1193-1202.
- 681 Flores, E., and Herrero, A. (2010a). Compartmentalized function through cell  
682 differentiation in filamentous cyanobacteria. *Nat Rev Microbiol* 8, 39-50.
- 683 Flores, E., and Herrero, A. (2010b). Compartmentalized function through cell  
684 differentiation in filamentous cyanobacteria. *Nature Reviews Microbiology* 8,  
685 39-50.
- 686 Gandham, L., Nomellini, J.F., and Smit, J. (2012). Evaluating secretion and surface  
687 attachment of SapA, an S-layer-associated metalloprotease of *Caulobacter*  
688 *crescentus*. *Arch Microbiol* 194, 865-877.
- 689 Gantt, E. (2011). Oxygenic photosynthesis and the distribution of chloroplasts.  
690 *Photosynth Res* 107, 1-6.
- 691 Gerbino, E., Carasi, P., Mobili, P., Serradell, M.A., and Gomez-Zavaglia, A. (2015). Role  
692 of S-layer proteins in bacteria. *World J Microbiol Biotechnol* 31, 1877-1887.
- 693 Golden, J.W., Robinson, S.J., and Haselkorn, R. (1985). Rearrangement of nitrogen  
694 fixation genes during heterocyst differentiation in the cyanobacterium  
695 *Anabaena*. *Nature* 314, 419-423.
- 696 Gore, J., Bryant, Z., Stone, M.D., Nollmann, M., Cozzarelli, N.R., and Bustamante, C.  
697 (2006). Mechanochemical analysis of DNA gyrase using rotor bead tracking.  
698 *Nature* 439, 100-104.
- 699 Gupta, M., and Carr, N. (1981). Enzyme activities related to cyanophycin metabolism  
700 in heterocysts and vegetative cells of *Anabaena* spp. *J Gen Microbiol* 125, 17-  
701 23.
- 702 Higa, K.C., Rajagopalan, R., Risser, D.D., Rivers, O.S., Tom, S.K., Videau, P., and  
703 Callahan, S.M. (2012). The RGSGR amino acid motif of the intercellular  
704 signalling protein, HetN, is required for patterning of heterocysts in  
705 *Anabaena* sp. strain PCC 7120. *Mol Microbiol* 83, 682-693.
- 706 Higo, A., Katoh, H., Ohmori, K., Ikeuchi, M., and Ohmori, M. (2006). The role of a gene  
707 cluster for trehalose metabolism in dehydration tolerance of the filamentous  
708 cyanobacterium *Anabaena* sp PCC 7120. *Microbiology-Sgm* 152, 979-987.
- 709 Hor, L., Dobson, R.C., Downton, M.T., Wagner, J., Hutton, C.A., and Perugini, M.A.  
710 (2013). Dimerization of bacterial diaminopimelate epimerase is essential for  
711 catalysis. *J Biol Chem* 288, 9238-9248.
- 712 Hu, H.X., Jiang, Y.L., Zhao, M.X., Cai, K., Liu, S., Wen, B., Lv, P., Zhang, Y., Peng, J., Zhong,  
713 H., Yu, H.M., Ren, Y.M., Zhang, Z., Tian, C., Wu, Q., Oliveberg, M., Zhang, C.C.,  
714 Chen, Y., and Zhou, C.Z. (2015). Structural insights into HetR-PatS interaction  
715 involved in cyanobacterial pattern formation. *Sci Rep* 5, 16470.
- 716 Hu, N.T., Thiel, T., Giddings, T.H., Jr., and Wolk, C.P. (1981). New *Anabaena* and  
717 *Nostoc* cyanophages from sewage settling ponds. *Virology* 114, 236-246.
- 718 Hu, Y., Fay, A.W., Lee, C.C., Wiig, J.A., and Ribbe, M.W. (2010). Dual functions of NifEN:  
719 insights into the evolution and mechanism of nitrogenase. *Dalton Trans* 39,  
720 2964-2971.

- 721 Hu, Y., Zhang, X., Shi, Y., Zhou, Y., Zhang, W., Su, X.D., Xia, B., Zhao, J., and Jin, C.  
722 (2011). Structures of Anabaena calcium-binding protein CcbP: insights into  
723 Ca<sup>2+</sup> signaling during heterocyst differentiation. *J Biol Chem* 286, 12381-  
724 12388.
- 725 Huang, X., Dong, Y., and Zhao, J. (2004). HetR homodimer is a DNA-binding protein  
726 required for heterocyst differentiation, and the DNA-binding activity is  
727 inhibited by PatS. *Proc Natl Acad Sci U S A* 101, 4848-4853.
- 728 Huang, Y., Li, C., Zhang, H., Liang, S., Han, S., Lin, Y., Yang, X., and Zheng, S. (2015).  
729 Monomeric Corynebacterium glutamicum N-acetyl glutamate kinase  
730 maintains sensitivity to L-arginine but has a lower intrinsic catalytic activity.  
731 *Appl Microbiol Biotechnol*.
- 732 Juttner, F. (1983). <sup>14</sup>C-labeled metabolites in heterocysts and vegetative cells of  
733 Anabaena cylindrica filaments and their presumptive function as transport  
734 vehicles of organic carbon and nitrogen. *J Bacteriol* 155, 628-633.
- 735 Kawai, E., Akatsuka, H., Idei, A., Shibatani, T., and Omori, K. (1998). Serratia  
736 marcescens S-layer protein is secreted extracellularly via an ATP-binding  
737 cassette exporter, the Lip system. *Mol Microbiol* 27, 941-952.
- 738 Khudyakov, I., and Wolk, C.P. (1996). Evidence that the hanA gene coding for HU  
739 protein is essential for heterocyst differentiation in, and cyanophage A-4(L)  
740 sensitivity of, Anabaena sp. strain PCC 7120. *J Bacteriol* 178, 3572-3577.
- 741 Kolman, M.A., Nishi, C.N., Perez-Cenci, M., and Salerno, G.L. (2015). Sucrose in  
742 cyanobacteria: from a salt-response molecule to play a key role in nitrogen  
743 fixation. *Life (Basel)* 5, 102-126.
- 744 Kumar, K., Mella-Herrera, R.A., and Golden, J.W. (2010a). Cyanobacterial  
745 Heterocysts. *Cold Spring Harbor Perspectives in Biology* 2.
- 746 Kumar, K., Mella-Herrera, R.A., and Golden, J.W. (2010b). Cyanobacterial  
747 heterocysts. *Cold Spring Harb Perspect Biol* 2, a000315.
- 748 Lechno-Yossef, S., Fan, Q., Ehira, S., Sato, N., and Wolk, C.P. (2006). Mutations in four  
749 regulatory genes have interrelated effects on heterocyst maturation in  
750 Anabaena sp. strain PCC 7120. *J Bacteriol* 188, 7387-7395.
- 751 Lechno-Yossef, S., Fan, Q., Wojciuch, E., and Wolk, C.P. (2011). Identification of ten  
752 Anabaena sp. genes that under aerobic conditions are required for growth on  
753 dinitrogen but not for growth on fixed nitrogen. *J Bacteriol* 193, 3482-3489.
- 754 Leganes, F., Fernandez-Pinas, F., and Wolk, C.P. (1998). A transposition-induced  
755 mutant of Nostoc ellipsosporum implicates an arginine-biosynthetic gene in  
756 the formation of cyanophycin granules and of functional heterocysts and  
757 akinetes. *Microbiology* 144 ( Pt 7), 1799-1805.
- 758 Liang, W., Zhou, Y., Wang, L., You, X., Zhang, Y., Cheng, C.L., and Chen, W. (2012).  
759 Ultrastructural, physiological and proteomic analysis of Nostoc flagelliforme  
760 in response to dehydration and rehydration. *J Proteomics* 75, 5604-5627.
- 761 Llacer, J.L., Contreras, A., Forchhammer, K., Marco-Marin, C., Gil-Ortiz, F., Maldonado,  
762 R., Fita, I., and Rubio, V. (2007). The crystal structure of the complex of PII  
763 and acetylglutamate kinase reveals how PII controls the storage of nitrogen  
764 as arginine. *Proc Natl Acad Sci U S A* 104, 17644-17649.

- 765 Lopez-Igual, R., Flores, E., and Herrero, A. (2010). Inactivation of a heterocyst-  
766 specific invertase indicates a principal role of sucrose catabolism in  
767 heterocysts of *Anabaena* sp. *J Bacteriol* 192, 5526-5533.
- 768 Lu, J.J., Shi, L., Chen, W.L., and Wang, L. (2014). The regulation of HanA during  
769 heterocyst development in cyanobacterium *Anabaena* sp. PCC 7120. *World J*  
770 *Microbiol Biotechnol* 30, 2673-2680.
- 771 Madan, A.P., and Nierzwicki-Bauer, S.A. (1993). In situ detection of transcripts for  
772 ribulose-1,5-bisphosphate carboxylase in cyanobacterial heterocysts. *J*  
773 *Bacteriol* 175, 7301-7306.
- 774 Maldener, I., Fiedler, G., Ernst, A., Fernandez-Pinas, F., and Wolk, C.P. (1994).  
775 Characterization of devA, a gene required for the maturation of  
776 proheterocysts in the cyanobacterium *Anabaena* sp. strain PCC 7120. *J*  
777 *Bacteriol* 176, 7543-7549.
- 778 Maldener, I., Hannus, S., and Kammerer, M. (2003). Description of five mutants of the  
779 cyanobacterium *Anabaena* sp strain PCC 7120 affected in heterocyst  
780 differentiation and identification of the transposon-tagged genes. *FEMS*  
781 *Microbiol Lett* 224, 205-213.
- 782 Martin, W., Rujan, T., Richly, E., Hansen, A., Cornelsen, S., Lins, T., Leister, D., Stoebe,  
783 B., Hasegawa, M., and Penny, D. (2002). Evolutionary analysis of Arabidopsis,  
784 cyanobacterial, and chloroplast genomes reveals plastid phylogeny and  
785 thousands of cyanobacterial genes in the nucleus. *Proc Natl Acad Sci U S A* 99,  
786 12246-12251.
- 787 Maurya, G.K., Modi, K., and Misra, H.S. (2016). Divisome and segrosome components  
788 of *Deinococcus radiodurans* interact through cell division regulatory  
789 proteins. *Microbiology*.
- 790 Meeks, J.C., Campbell, E.L., Summers, M.L., and Wong, F.C. (2002). Cellular  
791 differentiation in the cyanobacterium *Nostoc punctiforme*. *Arch Microbiol*  
792 178, 395-403.
- 793 Meeks, J.C., Wycoff, K.L., Chapman, J.S., and Enderlin, C.S. (1983). Regulation of  
794 expression of nitrate and dinitrogen assimilation by *Anabaena* species. *Appl*  
795 *Environ Microbiol* 45, 1351-1359.
- 796 Mevarech, M., Rice, D., and Haselkorn, R. (1980). Nucleotide sequence of a  
797 cyanobacterial nifH gene coding for nitrogenase reductase. *Proc Natl Acad Sci*  
798 *U S A* 77, 6476-6480.
- 799 Minaeva, E., Forchhammer, K., and Ermilova, E. (2015). Glutamine Assimilation and  
800 Feedback Regulation of L-acetyl-N-glutamate Kinase Activity in *Chlorella*  
801 *variabilis* NC64A Results in Changes in Arginine Pools. *Protist* 166, 493-505.
- 802 Mitschke, J., Vioque, A., Haas, F., Hess, W.R., and Muro-Pastor, A.M. (2011). Dynamics  
803 of transcriptional start site selection during nitrogen stress-induced cell  
804 differentiation in *Anabaena* sp. PCC7120. *Proc Natl Acad Sci U S A* 108,  
805 20130-20135.
- 806 Muro-Pastor, A.M. (2014). The heterocyst-specific NsiR1 small RNA is an early  
807 marker of cell differentiation in cyanobacterial filaments. *MBio* 5, e01079-  
808 01014.
- 809 Muro-Pastor, A.M., and Hess, W.R. (2012). Heterocyst differentiation: from single  
810 mutants to global approaches. *Trends Microbiol* 20, 548-557.

- 811 Murry, M.A., and Wolk, C.P. (1989). Evidence that the barrier to the penetration of  
812 oxygen into heterocysts depends upon two layers of the cell envelope.  
813 *Archives of Microbiology* 151, 469–474.
- 814 Muszynski, A., Laus, M., Kijne, J.W., and Carlson, R.W. (2011). Structures of the  
815 lipopolysaccharides from *Rhizobium leguminosarum* RBL5523 and its UDP-  
816 glucose dehydrogenase mutant (exo5). *Glycobiology* 21, 55-68.
- 817 Napoli, A., Valenti, A., Salerno, V., Nadal, M., Garnier, F., Rossi, M., and Ciaramella, M.  
818 (2004). Reverse gyrase recruitment to DNA after UV light irradiation in  
819 *Sulfolobus solfataricus*. *J Biol Chem* 279, 33192-33198.
- 820 Nicolaisen, K., Mariscal, V., Bredemeier, R., Pernil, R., Moslavac, S., Lopez-Igual, R.,  
821 Maldener, I., Herrero, A., Schleiff, E., and Flores, E. (2009). The outer  
822 membrane of a heterocyst-forming cyanobacterium is a permeability barrier  
823 for uptake of metabolites that are exchanged between cells. *Mol Microbiol* 74,  
824 58-70.
- 825 Nomata, J., Maeda, M., Isu, A., Inoue, K., and Hisabori, T. (2015). Involvement of  
826 thioredoxin on the scaffold activity of NifU in heterocyst cells of the  
827 diazotrophic cyanobacterium *Anabaena* sp. strain PCC 7120. *J Biochem* 158,  
828 253-261.
- 829 Oliveira, P., Martins, N.M., Santos, M., Couto, N.A., Wright, P.C., and Tamagnini, P.  
830 (2015). The *Anabaena* sp. PCC 7120 Exoproteome: Taking a Peek outside the  
831 Box. *Life (Basel)* 5, 130-163.
- 832 Olsson-Francis, K., De La Torre, R., Towner, M.C., and Cockell, C.S. (2009). Survival of  
833 akinetes (resting-state cells of cyanobacteria) in low earth orbit and  
834 simulated extraterrestrial conditions. *Orig Life Evol Biosph* 39, 565-579.
- 835 Ow, S.Y., Cardona, T., Taton, A., Magnuson, A., Lindblad, P., Stensjo, K., and Wright,  
836 P.C. (2008). Quantitative shotgun proteomics of enriched heterocysts from  
837 *Nostoc* sp. PCC 7120 using 8-plex isobaric peptide tags. *J Proteome Res* 7,  
838 1615-1628.
- 839 Panda, B., Basu, B., Rajaram, H., and Kumar Apte, S. (2014). Methyl viologen  
840 responsive proteome dynamics of *Anabaena* sp. strain PCC7120. *Proteomics*  
841 14, 1895-1904.
- 842 Pandey, S., Rai, R., and Rai, L.C. (2012). Proteomics combines morphological,  
843 physiological and biochemical attributes to unravel the survival strategy of  
844 *Anabaena* sp. PCC7120 under arsenic stress. *J Proteomics* 75, 921-937.
- 845 Paz-Yepes, J., Flores, E., and Herrero, A. (2009). Expression and mutational analysis  
846 of the *glnB* genomic region in the heterocyst-forming Cyanobacterium  
847 *Anabaena* sp. strain PCC 7120. *J Bacteriol* 191, 2353-2361.
- 848 Perez, R., Forchhammer, K., Salerno, G., and Maldener, I. (2015). Clear differences in  
849 metabolic and morphological adaptations of akinetes of two Nostocales living  
850 in different habitats. *Microbiology*.
- 851 Perez, R., Forchhammer, K., Salerno, G., and Maldener, I. (2016). Clear differences in  
852 metabolic and morphological adaptations of akinetes of two Nostocales living  
853 in different habitats. *Microbiology* 162, 214-223.
- 854 Picossi, S., Valladares, A., Flores, E., and Herrero, A. (2004). Nitrogen-regulated genes  
855 for the metabolism of cyanophycin, a bacterial nitrogen reserve polymer:  
856 expression and mutational analysis of two cyanophycin synthetase and

- 857 cyanophycinase gene clusters in heterocyst-forming cyanobacterium  
858 *Anabaena* sp. PCC 7120. *J Biol Chem* 279, 11582-11592.
- 859 Porchia, A.C., Curatti, L., and Salerno, G.L. (1999). Sucrose metabolism in  
860 cyanobacteria: sucrose synthase from *Anabaena* sp. strain PCC 7119 is  
861 remarkably different from the plant enzymes with respect to substrate  
862 affinity and amino-terminal sequence. *Planta* 210, 34-40.
- 863 Ramon-Maiques, S., Marina, A., Gil-Ortiz, F., Fita, I., and Rubio, V. (2002). Structure of  
864 acetylglutamate kinase, a key enzyme for arginine biosynthesis and a  
865 prototype for the amino acid kinase enzyme family, during catalysis.  
866 *Structure* 10, 329-342.
- 867 Rippka, R., and Herdman, M. (1985). Division patterns and cellular differentiation in  
868 cyanobacteria. *Ann Inst Pasteur Microbiol* 136A, 33-39.
- 869 Risser, D.D., and Callahan, S.M. (2008). HetF and PatA control levels of HetR in  
870 *Anabaena* sp. strain PCC 7120. *J Bacteriol* 190, 7645-7654.
- 871 Risser, D.D., Wong, F.C., and Meeks, J.C. (2012). Biased inheritance of the protein  
872 PatN frees vegetative cells to initiate patterned heterocyst differentiation.  
873 *Proc Natl Acad Sci U S A* 109, 15342-15347.
- 874 Rossetti, V., Schirrmeister, B.E., Bernasconi, M.V., and Bagheri, H.C. (2010). The  
875 evolutionary path to terminal differentiation and division of labor in  
876 cyanobacteria. *J Theor Biol* 262, 23-34.
- 877 Sakamoto, T., Yoshida, T., Arima, H., Hatanaka, Y., Takani, Y., and Tamaru, Y. (2009).  
878 Accumulation of trehalose in response to desiccation and salt stress in the  
879 terrestrial cyanobacterium *Nostoc commune*. *Phycological Research* 57, 66-  
880 73.
- 881 Sandh, G., Ramstrom, M., and Stensjo, K. (2014). Analysis of the early heterocyst Cys-  
882 proteome in the multicellular cyanobacterium *Nostoc punctiforme* reveals  
883 novel insights into the division of labor within diazotrophic filaments. *BMC*  
884 *Genomics* 15, 1064.
- 885 Sarma, T.A., Ahuja, G., and Khattar, J.I. (2004). Nutrient stress causes akinete  
886 differentiation in cyanobacterium *Anabaena torulosa* with concomitant  
887 increase in nitrogen reserve substances. *Folia Microbiol (Praha)* 49, 557-561.
- 888 Schirrmeister, B.E., Antonelli, A., and Bagheri, H.C. (2011). The origin of  
889 multicellularity in cyanobacteria. *BMC Evol Biol* 11, 45.
- 890 Serrano, G.C.D., Figueira, T.R.E.S., Kiyota, E., Zanata, N., and Arruda, P. (2012). Lysine  
891 degradation through the saccharopine pathway in bacteria: LKR and SDH in  
892 bacteria and its relationship to the plant and animal enzymes. *Febs Letters*  
893 586, 905-911.
- 894 Shen, G., Balasubramanian, R., Wang, T., Wu, Y., Hoffart, L.M., Krebs, C., Bryant, D.A.,  
895 and Golbeck, J.H. (2007). SufR coordinates two [4Fe-4S]<sup>2+</sup>, 1+ clusters and  
896 functions as a transcriptional repressor of the sufBCDS operon and an  
897 autoregulator of sufR in cyanobacteria. *J Biol Chem* 282, 31909-31919.
- 898 Shevchenko, A., Wilm, M., Vorm, O., and Mann, M. (1996). Mass spectrometric  
899 sequencing of proteins silver-stained polyacrylamide gels. *Anal Chem* 68,  
900 850-858.
- 901 Simon, R.D. (1977). Macromolecular composition of spores from the filamentous  
902 cyanobacterium *Anabaena cylindrica*. *J Bacteriol* 129, 1154-1155.

- 903 Singh, S.P., and Montgomery, B.L. (2011). Determining cell shape: adaptive  
904 regulation of cyanobacterial cellular differentiation and morphology. *Trends*  
905 *Microbiol* 19, 278-285.
- 906 Smarda, J., Smajs, D., Komrska, J., and Krzyzanek, V. (2002). S-layers on cell walls of  
907 cyanobacteria. *Micron* 33, 257-277.
- 908 Sukenik, A., Kaplan-Levy, R.N., Welch, J.M., and Post, A.F. (2012). Massive  
909 multiplication of genome and ribosomes in dormant cells (akinetes) of  
910 *Aphanizomenon ovalisporum* (Cyanobacteria). *ISME J* 6, 670-679.
- 911 Sukenik, A., Maldener, I., Delhaye, T., Viner-Mozzini, Y., Sela, D., and Bormans, M.  
912 (2015). Carbon assimilation and accumulation of cyanophycin during the  
913 development of dormant cells (akinetes) in the cyanobacterium  
914 *Aphanizomenon ovalisporum*. *Front Microbiol* 6, 1067.
- 915 Summers, M.L., and Meeks, J.C. (1996). Transcriptional regulation of *zwf*, encoding  
916 glucose-6-phosphate dehydrogenase, from the cyanobacterium *Nostoc*  
917 *punctiforme* strain ATCC 29133. *Mol Microbiol* 22, 473-480.
- 918 Tel-Or, E., and Stewart, W.D. (1976). Photosynthetic electron transport, ATP  
919 synthesis and nitrogenase activity in isolated heterocysts of *Anabaena*  
920 *cylindrica*. *Biochim Biophys Acta* 423, 189-195.
- 921 Thiel, T., Lyons, E.M., Erker, J.C., and Ernst, A. (1995). A second nitrogenase in  
922 vegetative cells of a heterocyst-forming cyanobacterium. *Proceedings of the*  
923 *National Academy of Sciences* 92, 9358-9362.
- 924 Thomas, J. (1970). Absence of the pigments of photosystem II of photosynthesis in  
925 heterocysts of a blue-green alga. *Nature* 228, 181-183.
- 926 Thomas, J., Meeks, J.C., Wolk, C.P., Shaffer, P.W., and Austin, S.M. (1977). Formation  
927 of glutamine from [<sup>13</sup>n]ammonia, [<sup>13</sup>n]dinitrogen, and [<sup>14</sup>C]glutamate by  
928 heterocysts isolated from *Anabaena cylindrica*. *J Bacteriol* 129, 1545-1555.
- 929 Vaara, M. (1992). Eight bacterial proteins, including UDP-N-acetylglucosamine  
930 acyltransferase (LpxA) and three other transferases of *Escherichia coli*,  
931 consist of a six-residue periodicity theme. *FEMS Microbiol Lett* 76, 249-254.
- 932 Valladares, A., Herrero, A., Pils, D., Schmetterer, G., and Flores, E. (2003).  
933 Cytochrome c oxidase genes required for nitrogenase activity and  
934 diazotrophic growth in *Anabaena* sp. PCC 7120. *Mol Microbiol* 47, 1239-1249.
- 935 Vargas, W.A., Nishi, C.N., Giarrocco, L.E., and Salerno, G.L. (2011). Differential roles of  
936 alkaline/neutral invertases in *Nostoc* sp. PCC 7120: Inv-B isoform is essential  
937 for diazotrophic growth. *Planta* 233, 153-162.
- 938 Videau, P., Rivers, O.S., Hurd, K., Ushijima, B., Oshiro, R.T., Ende, R.J., O'hanlon, S.M.,  
939 and Cozy, L.M. (2016). The heterocyst regulatory protein HetP and its  
940 homologs modulate heterocyst commitment in *Anabaena* sp. strain PCC  
941 7120. *Proc Natl Acad Sci U S A*.
- 942 Vizcaino, J.A., Csordas, A., Del-Toro, N., Dianas, J.A., Griss, J., Lavidas, I., Mayer, G.,  
943 Perez-Riverol, Y., Reisinger, F., Ternent, T., Xu, Q.W., Wang, R., and  
944 Hermjakob, H. (2016). 2016 update of the PRIDE database and its related  
945 tools. *Nucleic Acids Res* 44, 11033.
- 946 Wang, T., Shen, G., Balasubramanian, R., McIntosh, L., Bryant, D.A., and Golbeck, J.H.  
947 (2004). The *sufR* gene (*sll0088* in *Synechocystis* sp. strain PCC 6803)

- 948 functions as a repressor of the sufBCDS operon in iron-sulfur cluster  
949 biogenesis in cyanobacteria. *J Bacteriol* 186, 956-967.
- 950 Wilde, A., Lunser, K., Ossenbuhl, F., Nickelsen, J., and Borner, T. (2001).  
951 Characterization of the cyanobacterial ycf37: mutation decreases the  
952 photosystem I content. *Biochem J* 357, 211-216.
- 953 Wolk, C.P. (1966). Evidence of a role of heterocysts in the sporulation of a blue-  
954 green alga. *American Journal of Botany* 53, 3.
- 955 Wolk, C.P. (1968). Movement of carbon from vegetative cells to heterocysts in  
956 *Anabaena cylindrica*. *J Bacteriol* 96, 2138-2143.
- 957 Wolk, C.P., and Simon, R.D. (1969). Pigments and lipids of heterocysts. *Planta* 86, 92-  
958 97.
- 959 Xu, X., Gu, L., He, P., and Zhou, R. (2015). Characterization of five putative aspartate  
960 aminotransferase genes in the N<sub>2</sub>-fixing heterocystous cyanobacterium  
961 *Anabaena* sp. strain PCC 7120. *Microbiology* 161, 1219-1230.
- 962 Yamazaki, S., Nomata, J., and Fujita, Y. (2006). Differential operation of dual  
963 protochlorophyllide reductases for chlorophyll biosynthesis in response to  
964 environmental oxygen levels in the cyanobacterium *Leptolyngbya boryana*.  
965 *Plant Physiol* 142, 911-922.
- 966 Yoon, H.S., and Golden, J.W. (1998). Heterocyst pattern formation controlled by a  
967 diffusible peptide. *Science* 282, 935-938.
- 968 Zhang, W., Du, Y., Khudyakov, I., Fan, Q., Gao, H., Ning, D., Wolk, C.P., and Xu, X.  
969 (2007). A gene cluster that regulates both heterocyst differentiation and  
970 pattern formation in *Anabaena* sp. strain PCC 7120. *Mol Microbiol* 66, 1429-  
971 1443.
- 972 Zhou, R., Wei, X., Jiang, N., Li, H., Dong, Y., Hsi, K.L., and Zhao, J. (1998). Evidence that  
973 HetR protein is an unusual serine-type protease. *Proc Natl Acad Sci U S A* 95,  
974 4959-4963.
- 975 Zhou, R., and Wolk, C.P. (2002). Identification of an akinete marker gene in  
976 *Anabaena variabilis*. *J Bacteriol* 184, 2529-2532.
- 977 Zhou, R., and Wolk, C.P. (2003). A two-component system mediates developmental  
978 regulation of biosynthesis of a heterocyst polysaccharide. *J Biol Chem* 278,  
979 19939-19946.
- 980 Ziegler, K., Diener, A., Herpin, C., Richter, R., Deutzmann, R., and Lockau, W. (1998).  
981 Molecular characterization of cyanophycin synthetase, the enzyme catalyzing  
982 the biosynthesis of the cyanobacterial reserve material multi-L-arginyl-poly-  
983 L-aspartate (cyanophycin). *Eur J Biochem* 254, 154-159.

## 985 **FUNDING**

986  
987 This work was partially supported by USDA-NIFA GRANT11665597 (to R. Z.), and by  
988 the South Dakota Agricultural Experiment Station.

## 990 **ACKNOWLEDGEMENTS**

991  
992 YQ was supported by the South Dakota Agricultural Experiment Station. The authors  
993 would like to acknowledge use of the South Dakota State University Functional Genomics



*Proteomics of three cell types*

994 Core Facility supported in part by NSF/EPSCoR Grant No. 0091948 and by the State of  
995 South Dakota

996

997 **SUPPLEMENTARY MATERIAL**

998

999 The Supplementary Material for this article includes Figure S1 & S2, Table S1 & S2, and  
1000 Supplemental information for LC-MS/MS data analyses.

1001

1002 **TABLE 1** Distribution of FOX proteins, photosystem I and II proteins, and akinete  
 1003 marker protein in akinetes, heterocysts, and vegetative cells.  
 1004

| ORF#                | Annotation                                                     | Akinete                       | Heterocyst | Veget. Cell |
|---------------------|----------------------------------------------------------------|-------------------------------|------------|-------------|
|                     |                                                                | Normalized quantitative value |            |             |
| <b>FOX genes</b>    |                                                                |                               |            |             |
| 2715                | Histidine kinase HepN                                          | 0                             | 0          | 0.45        |
| 4573                | Neutral invertase InvB                                         | 0                             | 0          | 0.45        |
| 4916                | Hypothetical protein Npun_R1723, FraG/SepJ                     | 0                             | 0          | 0.45        |
| 6434                | Protein serine/threonine phosphatase PrpJ1                     | 0                             | 0          | 0.45        |
| 222                 | Nitrogen-fixing NifU-like protein                              | 0                             | 0          | 0.9         |
| 1433                | Response regulator receiver protein DevR                       | 0                             | 0          | 0.9         |
| 2881                | ParB-like partition protein, HGL region containing             | 0                             | 0          | 1.8         |
| 3957                | Processing proteinase Abp2                                     | 0                             | 0          | 2.71        |
| 3514                | Polyketide-type polyunsaturated fatty acid synthase PfaA/HglF  | 0                             | 2.45       | 0           |
| 5142                | FHA domain containing protein FraH                             | 0                             | 2.45       | 0.45        |
| 4208                | FHA modulated glycosyl transferase/transpeptidase PBP3         | 2.66                          | 2.45       | 0.45        |
| 3826                | Glucose-6-phosphate 1-dehydrogenase Zwl                        | 7.99                          | 2.45       | 1.35        |
| 5437                | Nitrogenase molybdenum-iron protein alpha chain NifD           | 10.66                         | 4.9        | 0           |
| 907                 | Nitrogenase molybdenum-iron cofactor biosynthesis protein NifN | 0                             | 7.36       | 0           |
| 3521                | Glycosyl transferase (group 1) HglT                            | 2.66                          | 7.36       | 0           |
| 1865                | Hypothetical protein Npun_F0815, Asp-, glu- rich product       | 0                             | 7.36       | 5.86        |
| 4777                | cytochrome c oxidase subunit II coxB2                          | 0                             | 7.36       | 0           |
| 1565                | Histidinol dehydrogenase HisD                                  | 5.33                          | 9.81       | 9.02        |
| 6242                | ABC transporter related DevA                                   | 0                             | 12.26      | 0           |
| 6485                | Histone-like DNA-binding protein HanA                          | 2.66                          | 12.26      | 19.4        |
| 715                 | Polyketide synthase thioester reductase subunit HglB           | 0                             | 14.71      | 0           |
| 6701                | Fe-S cluster assembly protein NifU                             | 0                             | 22.07      | 0           |
| 3078                | cytochrome c oxidase subunit II coxB3                          | 10.66                         | 22.07      | 0           |
| 911                 | Nitrogenase FeMo beta subunit protein NifK                     | 10.66                         | 22.07      | 0.45        |
| 153                 | Outer membrane efflux protein HgdD                             | 23.98                         | 22.07      | 4.06        |
| 3764                | Hypothetical protein Npun_R5769 Abp3                           | 37.3                          | 34.33      | 11.73       |
| 3480                | Putative transcriptional regulator (Crp/Fnr family) DevH       | 37.3                          | 44.14      | 12.18       |
| 1651                | Polysaccharide export protein                                  | 39.96                         | 49.04      | 2.26        |
| 3002                | Nitrogenase iron protein NifH                                  | 0                             | 61.3       | 0.45        |
| <b>Photosystems</b> |                                                                |                               |            |             |
| 3318                | Photosystem I assembly BtpA                                    | 0                             | 2.45       | 0.45        |
| 5296                | Photosystem I assembly protein ycf3                            | 0                             | 0          | 1.35        |
| 1589                | Photosystem I assembly Ycf4                                    | 2.66                          | 4.9        | 4.06        |
| 4482                | Photosystem I P700 apoprotein A2                               | 50.62                         | 17.17      | 12.18       |

*Proteomics of three cell types*

|                                        |                                                         |       |        |        |
|----------------------------------------|---------------------------------------------------------|-------|--------|--------|
| 5755                                   | Photosystem I iron-sulfur center                        | 18.65 | 26.97  | 18.04  |
| 2498                                   | Photosystem I reaction center protein PsaF, subunit III | 13.32 | 12.26  | 44.66  |
| 2501                                   | Photosystem I reaction center subunit XI                | 45.29 | 122.6  | 59.09  |
| 1809                                   | Photosystem I reaction center subunit IV                | 5.33  | 29.43  | 74.88  |
| 833                                    | Photosystem I reaction center subunit II                | 39.96 | 100.54 | 163.3  |
| 1817                                   | Photosystem II reaction center Psb28 protein            | 0     | 0      | 1.35   |
| 6255                                   | Photosystem II oxygen evolving complex protein PsbP     | 5.33  | 4.9    | 4.96   |
| 3007                                   | Photosystem II protein D2                               | 13.32 | 9.81   | 4.96   |
| 83                                     | Photosystem II reaction center protein H                | 0     | 2.45   | 4.96   |
| 2046                                   | Photosystem q(b) protein                                | 5.33  | 9.81   | 7.22   |
| 1649                                   | Photosystem II 44 kDa subunit reaction center protein   | 47.95 | 22.07  | 10.83  |
| 5644                                   | Photosystem II chlorophyll-binding protein CP47         | 47.95 | 29.43  | 14.89  |
| 3469                                   | Photosystem II 11 kDa protein                           | 21.31 | 22.07  | 17.59  |
| 3312                                   | Photosystem II oxygen evolving complex protein PsbU     | 5.33  | 12.26  | 31.58  |
| 4725                                   | Photosystem II manganese-stabilizing protein PsbO       | 42.62 | 71.11  | 104.66 |
| 755                                    | Photochlorophyllide reductase subunit N                 | 0     | 0      | 0.45   |
| <b>Akinete marker protein (AcaK43)</b> |                                                         |       |        |        |
| 1647                                   | PRC-barrel domain-containing protein AvaK               | 85.25 | 90.73  | 1.35   |

1005

1006 **TABLE 2** Proteins involved in biosynthesis of DNA, RNA, and protein, as well as cell  
 1007 division in akinetes, heterocysts, and vegetative cells respectively  
 1008

| ORF                                     | Annotation                                                                                | Akinete                       | Heterocyst | Veget. Cell |
|-----------------------------------------|-------------------------------------------------------------------------------------------|-------------------------------|------------|-------------|
|                                         |                                                                                           | Normalized quantitative value |            |             |
| <b>DNA replication and repair</b>       |                                                                                           |                               |            |             |
| DNA gyrase, helicase, and topoisomerase |                                                                                           |                               |            |             |
| 4759                                    | Single-strand binding protein                                                             | 0                             | 0          | 3.1577      |
| 3320                                    | DEAD/DEAH box helicase domain-containing protein                                          | 0                             | 2.45       | 4.51        |
| 5326                                    | Peptidase U62, modulator of DNA gyrase                                                    | 2.66                          | 0          | 0           |
| 3692                                    | DNA gyrase subunit A                                                                      | 2.66                          | 0          | 0           |
| 2972                                    | Protein splicing (intein) site                                                            | 5.33                          | 2.45       | 0.90        |
| 5282                                    | DNA topoisomerase I                                                                       | 10.66                         | 0          | 2.71        |
| 5834                                    | Microcin-processing peptidase 2                                                           | 13.32                         | 2.45       | 1.35        |
| 5835                                    | Peptidase U62 modulator of DNA gyrase                                                     | 13.32                         | 7.36       | 5.86        |
| DNA polymerase                          |                                                                                           |                               |            |             |
| 257                                     | Phage SPO1 DNA polymerase-related protein                                                 | 0                             | 0          | 0.45        |
| 3596                                    | DNA polymerase III, delta subunit                                                         | 0                             | 0          | 0.45        |
| <b>Nucleotide biosynthesis</b>          |                                                                                           |                               |            |             |
| 6322                                    | 5-(carboxyamino)imidazole ribonucleotide synthase                                         | 0                             | 0          | 0.45        |
| 3851                                    | ATP phosphoribosyltransferase catalytic subunit                                           | 0                             | 0          | 1.35        |
| 339                                     | Dihydroorotase                                                                            | 0                             | 2.45       | 0           |
| 4205                                    | Adenine phosphoribosyltransferase                                                         | 0                             | 2.45       | 4.51        |
| 2020                                    | Uracil phosphoribosyltransferase                                                          | 0                             | 2.45       | 2.26        |
| 2639                                    | Phosphoribosylaminoimidazole-succinocarboxamide synthase                                  | 0                             | 7.36       | 1.80        |
| 6314                                    | Phosphoadenylylsulfate reductase (thioredoxin)                                            | 0                             | 7.36       | 11.28       |
| 2240                                    | Phosphoribosyltransferase                                                                 | 0                             | 19.62      | 5.41        |
| 4194                                    | Phosphoribosylformylglycinamide synthase II                                               | 2.66                          | 0          | 0           |
| 2553                                    | Adenylosuccinate synthetase                                                               | 2.66                          | 0          | 2.26        |
| 3424                                    | Phosphomethylpyrimidine kinase                                                            | 2.66                          | 0          | 0.90        |
| 6546                                    | Dihydroorotase                                                                            | 2.66                          | 2.45       | 0           |
| 2309                                    | Orotate phosphoribosyltransferase                                                         | 2.66                          | 2.45       | 1.80        |
| 6261                                    | Bifunctional phosphoribosylaminoimidazolecarboxamide formyltransferase/IMP cyclohydrolase | 5.33                          | 0          | 1.80        |
| 6333                                    | Adenylosuccinate lyase                                                                    | 7.99                          | 0          | 4.96        |
| <b>Transcriptional regulation</b>       |                                                                                           |                               |            |             |
| RNA polymerase                          |                                                                                           |                               |            |             |
| 608                                     | RNA polymerase, sigma 70 subunit, RpoD subfamily                                          | 0                             | 0          | 0.45        |
| 1794                                    | DNA-directed RNA polymerase subunit omega                                                 | 0                             | 0          | 3.61        |
| 2126                                    | RNA polymerase, sigma subunit, RpsC/SigC                                                  | 0                             | 0          | 3.61        |
| 1436                                    | RNA polymerase sigma factor                                                               | 0                             | 0          | 3.16        |
| 1465                                    | RpoD family RNA polymerase sigma factor                                                   | 0                             | 0          | 0.45        |
| 1436                                    | RNA polymerase sigma factor                                                               | 0                             | 0          | 3.16        |
| 1571                                    | DNA-directed RNA polymerase gamma chain                                                   | 5.33                          | 0          | 4.96        |
| 2612                                    | DNA-directed RNA polymerase subunit alpha                                                 | 15.98                         | 29.43      | 13.08       |
| 1572                                    | DNA-directed RNA polymerase beta' subunit                                                 | 37.30                         | 2.45       | 3.16        |

*Proteomics of three cell types*

|                                  |                                                                      |       |       |       |
|----------------------------------|----------------------------------------------------------------------|-------|-------|-------|
| 1569                             | DNA-directed RNA polymerase subunit beta                             | 39.96 | 2.45  | 3.61  |
| <b>Transcriptional regulator</b> |                                                                      |       |       |       |
| 3282                             | SOS-response transcriptional repressor, LexA                         | 0     | 0     | 0.45  |
| 2666                             | Transcriptional regulator, LysR family                               | 0     | 0     | 9.92  |
| 5981                             | Transcriptional regulator, BofA protein family                       | 0     | 0     | 1.35  |
| 3539                             | Signal recognition particle protein                                  | 0     | 0     | 4.511 |
| 4517                             | Two component transcriptional regulator                              | 0     | 2.45  | 0.90  |
| 1692                             | Transcriptional regulator, GntR family                               | 0     | 4.90  | 0.45  |
| 3023                             | Transcriptional regulator                                            | 0     | 4.90  | 0.90  |
| 3487                             | Transcriptional regulator, LysR family                               | 0     | 4.90  | 3.61  |
| 1692                             | Transcriptional regulator, GntR family                               | 0     | 4.90  | 0.45  |
| 4132                             | Anti-sigma-factor antagonist                                         | 0     | 7.36  | 1.80  |
| 6455                             | Response regulator receiver protein                                  | 0     | 12.26 | 2.26  |
| 1420                             | Two component LuxR family transcriptional regulator                  | 5.33  | 4.90  | 3.16  |
| 4375                             | Putative transcriptional regulator                                   | 7.99  | 0     | 0.45  |
| 1173                             | Two component Transcriptional regulator, Winged helix family protein | 10.66 | 29.43 | 5.86  |
| 3590                             | Two component LuxR family transcriptional regulator                  | 26.64 | 14.71 | 10.83 |
| 557                              | AbrB family transcriptional regulator                                | 39.96 | 31.88 | 29.32 |
| <b>Protein synthesis</b>         |                                                                      |       |       |       |
| <b>Amino acid synthesis</b>      |                                                                      |       |       |       |
| 524                              | Amidohydrolase 2                                                     | 0     | 0     | 0.45  |
| 1031                             | Amidohydrolase                                                       | 0     | 0     | 0.45  |
| 6700                             | Aromatic amino acid beta-eliminating lyase/threonine aldolase        | 0     | 4.9   | 0     |
| 985                              | Diaminopimelate epimerase                                            | 0     | 4.90  | 4.06  |
| 2185                             | Acetylglutamate kinase                                               | 0     | 9.81  | 0.90  |
| 2435                             | Aspartate-semialdehyde dehydrogenase                                 | 0     | 4.90  | 1.35  |
| 6314                             | Phosphoadenylylsulfate reductase (thioredoxin)                       | 0     | 7.36  | 11.28 |
| 2446                             | Saccharopine dehydrogenase                                           | 7.99  | 0     | 0     |
| 3933                             | Taurine catabolism dioxygenase TauD/TfdA                             | 23.98 | 0     | 0     |
| 3947                             | Amidohydrolase 2                                                     | 31.97 | 0     | 0     |
| <b>tRNA synthetase</b>           |                                                                      |       |       |       |
| 260                              | Aspartyl-glutamyl-tRNA amidotransferase subunit A                    | 0     | 0     | 4.06  |
| 5328                             | CysteinyI-tRNA synthetase                                            | 0     | 0     | 0.45  |
| 39                               | Glutamyl-tRNA reductase                                              | 0     | 0     | 0.45  |
| 5530                             | Isoleucyl-tRNA synthetase                                            | 0     | 0     | 0.45  |
| 2962                             | Leucyl-tRNA synthetase                                               | 0     | 0     | 1.35  |
| 4316                             | Methionyl-tRNA synthetase                                            | 0     | 0     | 1.35  |
| 520                              | Putative histidyl-tRNA synthetase 2                                  | 0     | 0     | 6.32  |
| 1748                             | Seryl-tRNA synthetase                                                | 0     | 2.45  | 2.71  |
| 1102                             | Tryptophanyl-tRNA synthetase                                         | 0     | 2.45  | 0     |
| 3220                             | Tyrosyl-tRNA synthetase                                              | 0     | 2.45  | 1.35  |
| 81                               | Peptidyl-tRNA hydrolase                                              | 0     | 4.90  | 4.06  |
| 3740                             | Methionyl-tRNA formyltransferase                                     | 0     | 7.36  | 4.06  |
| 4380                             | Phenylalanyl-tRNA synthetase alpha subunit                           | 0     | 14.71 | 3.16  |
| 1850                             | Glutamyl-tRNA(Gln) amidotransferase, B subunit                       | 2.66  | 0     | 5.86  |
| 2270                             | Glycyl-tRNA synthetase alpha chain                                   | 2.66  | 0     | 0     |

*Proteomics of three cell types*

|                          |                                                     |       |       |       |
|--------------------------|-----------------------------------------------------|-------|-------|-------|
| 6531                     | Histidyl-tRNA synthetase                            | 2.66  | 7.36  | 2.71  |
| 6635                     | Arginyl-tRNA synthetase                             | 5.33  | 0     | 4.51  |
| 2649                     | Glycyl and Arginyl tRNA synthetase                  | 7.99  | 0     | 10.83 |
| 4909                     | Prolyl-tRNA synthetase                              | 7.99  | 0     | 4.96  |
| 3273                     | Glutamyl-tRNA synthetase                            | 7.99  | 2.45  | 1.80  |
| 3210                     | Lysyl-tRNA synthetase                               | 10.66 | 0     | 3.61  |
| 495                      | Phenylalanyl-tRNA synthetase, beta subunit          | 10.66 | 0     | 0     |
| 3786                     | Valyl-tRNA synthetase                               | 10.66 | 0     | 2.26  |
| 817                      | Threonyl-tRNA synthetase / Ser-tRNA(Thr) hydrolase  | 13.32 | 0     | 0.45  |
| 4277                     | Asparaginyl-tRNA synthetase                         | 15.98 | 0     | 0     |
| <b>Ribosomal protein</b> |                                                     |       |       |       |
| 685                      | 50S ribosomal protein L28                           | 0     | 0     | 4.06  |
| 1006                     | Ribosomal protein S21                               | 0     | 0     | 8.57  |
| 1567                     | Ribosomal protein S20                               | 0     | 0     | 10.38 |
| 1713                     | 30S ribosomal protein S18                           | 0     | 0     | 4.06  |
| 1999                     | Ribosomal protein L27                               | 0     | 0     | 4.51  |
| 2591                     | Ribosomal protein S19                               | 0     | 0     | 13.98 |
| 2594                     | LSU ribosomal protein L16P                          | 0     | 0     | 9.02  |
| 2595                     | Ribosomal protein L29                               | 0     | 0     | 6.77  |
| 2598                     | Ribosomal protein L24                               | 0     | 0     | 4.96  |
| 2603                     | LSU ribosomal protein L18P                          | 0     | 0     | 3.61  |
| 2617                     | 50S ribosomal protein L31                           | 0     | 0     | 3.61  |
| 3791                     | 30S ribosomal protein 3                             | 0     | 0     | 2.71  |
| 4679                     | 50S ribosomal protein L20                           | 0     | 0     | 9.92  |
| 5266                     | Ribosomal protein S15                               | 0     | 0     | 3.16  |
| 2554                     | 50S ribosomal protein L25                           | 0     | 2.45  | 4.96  |
| 2592                     | 50S ribosomal protein L22                           | 0     | 2.45  | 7.22  |
| 2596                     | 30S ribosomal protein S17                           | 0     | 2.45  | 4.51  |
| 4086                     | 30S ribosomal protein S6                            | 0     | 2.45  | 4.06  |
| 2613                     | 50S ribosomal protein L17                           | 0     | 4.90  | 10.38 |
| 2973                     | 50S ribosomal protein L9                            | 0     | 4.90  | 11.28 |
| 6002                     | Ribosomal protein L11 methyltransferase             | 0     | 4.90  | 0     |
| 2588                     | LSU ribosomal protein L4P                           | 0     | 12.26 | 10.83 |
| 6310                     | Sigma 54 modulation protein/ribosomal protein S30EA | 0     | 19.62 | 18.50 |
| 1549                     | 50S ribosomal protein L7/L12                        | 2.66  | 0     | 22.56 |
| 2590                     | 50S ribosomal protein L2                            | 2.66  | 2.45  | 10.38 |
| 2609                     | SSU ribosomal protein S13P                          | 2.66  | 2.45  | 13.08 |
| 5950                     | 30S ribosomal protein S12                           | 2.66  | 2.45  | 3.16  |
| 1543                     | 50S ribosomal protein L19                           | 2.66  | 4.90  | 3.61  |
| 2615                     | LSU ribosomal protein L13P                          | 2.66  | 7.36  | 10.83 |
| 2589                     | LSU ribosomal protein L23P                          | 2.66  | 9.81  | 7.67  |
| 2601                     | 50S ribosomal protein L6                            | 2.66  | 9.81  | 7.67  |
| 5954                     | Ribosomal protein S10                               | 2.66  | 12.26 | 11.73 |
| 1548                     | 50S ribosomal protein L10                           | 5.33  | 4.90  | 3.61  |
| 3538                     | 30S ribosomal protein S16                           | 5.33  | 4.90  | 12.18 |
| 5685                     | 30S ribosomal protein S14                           | 5.33  | 4.90  | 8.12  |
| 5951                     | SSU ribosomal protein S7P                           | 5.33  | 4.90  | 20.75 |
| 2610                     | SSU ribosomal protein S11P                          | 5.33  | 7.36  | 3.61  |

*Proteomics of three cell types*

|                               |                                                   |        |        |       |
|-------------------------------|---------------------------------------------------|--------|--------|-------|
| 2616                          | 30S ribosomal protein S9                          | 5.33   | 7.36   | 8.12  |
| 2597                          | LSU ribosomal protein L14P                        | 5.33   | 12.26  | 8.57  |
| 2586                          | LSU ribosomal protein L3P                         | 5.33   | 19.62  | 7.67  |
| 4920                          | SSU ribosomal protein S4P                         | 7.99   | 2.45   | 4.96  |
| 2605                          | 50S ribosomal protein L15                         | 10.66  | 14.71  | 17.14 |
| 1547                          | 50S ribosomal protein L1                          | 10.66  | 26.97  | 21.65 |
| 2600                          | 30S ribosomal protein S8                          | 13.32  | 9.81   | 8.12  |
| 2604                          | 30S ribosomal protein S5                          | 13.32  | 17.17  | 24.36 |
| 2599                          | 50S ribosomal protein L5                          | 13.32  | 22.07  | 21.65 |
| 1546                          | 50S ribosomal protein L11                         | 15.98  | 22.07  | 16.24 |
| 2593                          | SSU ribosomal protein S3P                         | 18.65  | 14.71  | 9.47  |
| 4068                          | SSU ribosomal protein S2P                         | 21.31  | 12.26  | 10.83 |
| 5643                          | 30S ribosomal protein S1                          | 26.64  | 26.97  | 4.96  |
| Translation initiation factor |                                                   |        |        |       |
| 2608                          | Bacterial translation initiation factor 1 (bIF-1) | 0      | 0      | 5.86  |
| 5811                          | Translation initiation factor IF-3                | 0      | 0      | 5.41  |
| 3766                          | Translation initiation factor IF-2                | 13.32  | 0      | 2.71  |
| 5952                          | Translation elongation factor 2 (EF-2/EF-G)       | 50.62  | 7.36   | 12.63 |
| 5953                          | Translation elongation factor 1A (EF-1A/EF-Tu)    | 175.82 | 193.72 | 72.63 |

1009

1010 **ORF#**: open reading frame # were given by

1011 <http://scorpius.ucdavis.edu/gmod/cgibin/site/anabaena02?page=gblast>

*Proteomics of three cell types*

**TABLE 3** Proteins involved in synthesizing and transporting polysaccharides and peptidoglycan in akinetes, heterocysts, and vegetative cells (low similarity of the S-layer domain containing proteins are highlighted in grey)

| ORF                                     | Annotation                                                         | Akinete                       | Heterocyst | Veget. Cell |
|-----------------------------------------|--------------------------------------------------------------------|-------------------------------|------------|-------------|
|                                         |                                                                    | Normalized quantitative value |            |             |
| <b>Membrane transporter</b>             |                                                                    |                               |            |             |
| S-layer protein                         |                                                                    |                               |            |             |
| 3288                                    | S-layer domain-containing protein                                  | 5.33                          | 2.45       | 3.61        |
| 5127                                    | porin; major outer membrane protein                                | 5.33                          | 4.90       | 0           |
| 1127                                    | S-layer domain-containing protein                                  | 37.30                         | 0          | 0           |
| 1753                                    | S-layer domain-containing protein                                  | 39.96                         | 24.52      | 23.46       |
| 2713                                    | porin; major outer membrane protein                                | 50.62                         | 90.73      | 5.86        |
| 2780                                    | hypothetical protein all7614                                       | 66.60                         | 110.34     | 0           |
| 1756                                    | S-layer region-like                                                | 90.57                         | 139.77     | 14.89       |
| 1758                                    | hypothetical protein all4499                                       | 191.80                        | 223.14     | 60.45       |
| 3008                                    | hypothetical protein alr4550                                       | 359.63                        | 328.58     | 41.50       |
| ABC transporter                         |                                                                    |                               |            |             |
| 4203                                    | ABC-type transporter, integral membrane subunit                    | 0                             | 0          | 0.45        |
| 5640                                    | ABC transporter-like                                               | 0                             | 0          | 0.45        |
| 241                                     | ABC-type transporter, periplasmic subunit family 3                 | 0                             | 2.45       | 0           |
| 3481                                    | periplasmic phosphate-binding protein of phosphate ABC transporter | 0                             | 2.45       | 1.80        |
| 4968                                    | ABC transporter related                                            | 0                             | 2.45       | 0           |
| 767                                     | ABC transporter-like                                               | 0                             | 4.90       | 0           |
| 2712                                    | ABC-type metal ion transporter, periplasmic subunit                | 0                             | 4.90       | 0.45        |
| 3485                                    | phosphate ABC-transporter periplasmic phosphate-binding protein    | 0                             | 4.90       | 1.35        |
| 3524                                    | ABC transporter, phosphate-binding protein                         | 0                             | 9.81       | 3.61        |
| 6242                                    | ABC transporter related                                            | 0                             | 12.26      | 0           |
| 6227                                    | nitrate ABC transporter, ATPase subunits C and D                   | 0                             | 17.17      | 16.69       |
| 3042                                    | molybdenum ABC transporter, periplasmic molybdate-binding protein  | 0                             | 24.52      | 0           |
| 1130                                    | ABC transporter related                                            | 2.66                          | 0          | 0           |
| 6476                                    | periplasmic sugar-binding protein of ABC transporter               | 5.33                          | 17.17      | 11.28       |
| 2319                                    | substrate-binding protein of ABC transporter                       | 7.99                          | 7.36       | 0           |
| 1135                                    | ABC transporter, substrate-binding protein, aliphatic sulphonates  | 10.66                         | 0          | 0           |
| 5097                                    | ABC transporter ATP-binding protein                                | 10.66                         | 17.17      | 2.26        |
| 4212                                    | phosphate ABC transporter, periplasmic phosphate-binding protein   | 13.32                         | 22.07      | 15.34       |
| 1132                                    | ABC transporter, substrate-binding protein, aliphatic sulphonates  | 26.64                         | 0          | 0           |
| <b>Cell wall and secretion proteins</b> |                                                                    |                               |            |             |
| Cell division                           |                                                                    |                               |            |             |



*Proteomics of three cell types*

|                                                                         |                                                                                                                     |       |        |       |
|-------------------------------------------------------------------------|---------------------------------------------------------------------------------------------------------------------|-------|--------|-------|
| 668                                                                     | Cell division transporter substrate-binding protein FtsY                                                            | 0     | 0      | 0.45  |
| 2065                                                                    | Septum formation topological specificity factor MinE                                                                | 0     | 0      | 0.90  |
| 6254                                                                    | Septum formation protein Maf                                                                                        | 0     | 7.36   | 0     |
| 2066                                                                    | septum site-determining protein MinD                                                                                | 2.66  | 4.90   | 1.80  |
| 4730                                                                    | cell division protein FtsZ                                                                                          | 10.66 | 12.26  | 3.61  |
| <b>Cell wall hydrolase/autolysin and secreted extracellular protein</b> |                                                                                                                     |       |        |       |
| 2682                                                                    | secretion protein HlyD family protein                                                                               | 0     | 0      | 0.45  |
| 1424                                                                    | secretion protein HlyD                                                                                              | 0     | 0      | 0.90  |
| 4502                                                                    | Type II secretion system F domain protein                                                                           | 0     | 0      | 2.26  |
| 4500                                                                    | type II secretion system protein E                                                                                  | 0     | 0      | 6.77  |
| 2516                                                                    | cell wall hydrolase/autolysin                                                                                       | 0     | 2.45   | 0.90  |
| 5393                                                                    | general secretion pathway protein H                                                                                 | 0     | 4.90   | 78.49 |
| 5458                                                                    | cell wall hydrolase/autolysin                                                                                       | 0     | 9.81   | 0     |
| 3516                                                                    | Secretion protein HlyD                                                                                              | 0     | 24.52  | 0     |
| 5545                                                                    | secretion protein HlyD                                                                                              | 2.66  | 7.36   | 2.26  |
| 6481                                                                    | general secretion pathway protein D                                                                                 | 7.99  | 0      | 7.22  |
| 6360                                                                    | FG-GAP repeat-containing protein                                                                                    | 7.99  | 58.85  | 1.35  |
| 4111                                                                    | outer membrane secretion protein Alr0267                                                                            | 37.30 | 85.82  | 3.16  |
| <b>Extracellular biomolecules</b>                                       |                                                                                                                     |       |        |       |
| <b>Glycolipid</b>                                                       |                                                                                                                     |       |        |       |
| 2637                                                                    | UDP-3-0-acyl N-acetylglucosamine deacetylase                                                                        | 0     | 0      | 0.90  |
| 2668                                                                    | hexapaptide repeat-containing transferase                                                                           | 0     | 2.45   | 0     |
| 715                                                                     | polyketide synthase thioester reductase subunit HglB                                                                | 0     | 14.713 | 0     |
| 3516                                                                    | Secretion protein HlyD                                                                                              | 0     | 24.52  | 0     |
| 4208                                                                    | FHA modulated glycosyl transferase/transpeptidase                                                                   | 2.66  | 2.45   | 0.45  |
| 3521                                                                    | glycosyl transferase, group 1                                                                                       | 2.66  | 7.36   | 0     |
| 153                                                                     | outer membrane efflux protein                                                                                       | 23.98 | 22.07  | 4.06  |
| 2638                                                                    | surface antigen (D15)                                                                                               | 37.30 | 4.90   | 2.71  |
| <b>Peptidoglycan</b>                                                    |                                                                                                                     |       |        |       |
| 6325                                                                    | peptidoglycan binding domain-containing protein                                                                     | 0     | 0      | 2.71  |
| 6200                                                                    | N-acetylglucosamine 6-phosphate deacetylase                                                                         | 0     | 0      | 0.90  |
| 4163                                                                    | UDP-N-acetylglucosamine--N-acetylmuramyl-(pentapeptide) pyrophosphoryl-undecaprenol N-acetylglucosamine transferase | 0     | 0      | 0.45  |
| 2637                                                                    | UDP-3-0-acyl N-acetylglucosamine deacetylase                                                                        | 0     | 0      | 0.90  |
| 4461                                                                    | N-acetylmuramic acid-6-phosphate etherase                                                                           | 0     | 0      | 0.45  |
| 5297                                                                    | UDP-N-acetylmuramoylalanyl-D-glutamate--2,6-diaminopimelate ligase                                                  | 0     | 2.45   | 0.90  |
| 4123                                                                    | UDP-glucose/GDP-mannose dehydrogenase                                                                               | 0     | 2.45   | 9.47  |
| 1382                                                                    | peptidoglycan binding domain-containing protein                                                                     | 0     | 4.90   | 11.28 |
| 5461                                                                    | peptidoglycan binding domain-containing protein                                                                     | 0     | 4.90   | 2.71  |
| 715                                                                     | polyketide synthase thioester reductase subunit HglB                                                                | 0     | 14.71  | 0     |
| 5462                                                                    | UDP-N-acetyl glucosamine-2-epimerase                                                                                | 2.66  | 2.45   | 1.35  |

*Proteomics of three cell types*

|      |                                                      |       |       |       |
|------|------------------------------------------------------|-------|-------|-------|
| 2312 | penicillin-binding protein, transpeptidase           | 2.66  | 4.90  | 1.80  |
| 2648 | UDP-N-acetylmuramoyl-L-alanyl-D-glutamate synthetase | 5.33  | 0     | 0.90  |
| 5403 | N-acetylmuramoyl-L-alanine amidase                   | 5.33  | 0     | 0.45  |
| 3772 | peptidoglycan binding domain-containing protein      | 5.33  | 14.71 | 10.38 |
| 2518 | N-acetylmuramoyl-L-alanine amidase                   | 10.66 | 14.71 | 0.45  |
| 1651 | polysaccharide export protein                        | 39.96 | 49.04 | 2.26  |

*Proteomics of three cell types*

**TABLE 4** Proteins involved in metabolism of cyanophycin, glycogen, and sucrose in akinetes, heterocysts, and vegetative cells (enzymes responsible for anabolism are highlighted in grey)

| ORF                         | Annotation                                                   | Akinete                       | Heterocyst | Veget. Cell |
|-----------------------------|--------------------------------------------------------------|-------------------------------|------------|-------------|
|                             |                                                              | Normalized quantitative value |            |             |
| <b>Cyanophycin/arginine</b> |                                                              |                               |            |             |
| 1510                        | cyanophycin synthetase                                       | 2.66                          | 0          | 0           |
| 1272                        | Cyanophycinase, Serine peptidase, MEROPS family S51          | 7.99                          | 4.90       | 0.45        |
| 3212                        | putative cyanophycinase                                      | 0                             | 12.26      | 0           |
| 1511                        | cyanophycinase                                               | 0                             | 9.81       | 2.26        |
| 4256                        | isoaspartyl dipeptidase, peptidase T2, asparaginase 2        | 0                             | 0          | 4.96        |
| 2185                        | acetylglutamate kinase                                       | 0                             | 9.81       | 0.90        |
| 1480                        | N-acetyl-gamma-glutamyl-phosphate reductase                  | 10.66                         | 19.62      | 5.86        |
| 3400                        | Nitrogen regulatory protein P-II (GlnB, GlnK)                | 5.33                          | 29.43      | 5.86        |
| <b>Sucrose/trehalose</b>    |                                                              |                               |            |             |
| 4634                        | sucrose synthase SuS-B                                       | 21.31                         | 0          | 0           |
| 3602                        | sucrose synthase SuS-A                                       | 15.98                         | 0          | 0           |
| 4573                        | neutral invertase InvB                                       | 0                             | 0          | 0.45        |
| 3842                        | sucrose phosphatase SPP                                      | 0                             | 7.36       | 1.35        |
| 238                         | malto-oligosyltrehalose synthase                             | 5.33                          | 0          | 0           |
| <b>Glycogen</b>             |                                                              |                               |            |             |
| 1048                        | glycogen synthase                                            | 21.31                         | 12.26      | 1.35        |
| 2144                        | phosphoglucomutase/phosphomannomutase                        | 13.32                         | 12.26      | 20.30       |
| 3396                        | phosphoglucomutase/phosphomannomutase alpha/beta/subunit     | 5.33                          | 2.45       | 1.80        |
| 6292                        | 1,4-alpha-glucan-branching enzyme                            | 2.66                          | 0          | 0.45        |
| 5134                        | glycogen debranching enzyme GlgX                             | 0                             | 0          | 0.45        |
| 341                         | Phosphoglycerate/bisphosphoglycerate mutase                  | 0                             | 0          | 0.45        |
| 5891                        | Phosphoglycerate mutase                                      | 0                             | 0          | 0.45        |
| 6104                        | phosphoglycerate mutase, 2,3-bisphosphoglycerate-independent | 0                             | 0          | 3.61        |
| 5419                        | phosphoglycerate mutase                                      | 0                             | 0          | 0.90        |

*Proteomics of three cell types*

1012 **FIGURE 1** *Anabaena cylindrica* ATCC 29414 has three types of cells in filaments (A).  
1013 The purity of the isolated akinetes (B) and heterocysts (C) was analyzed by differential  
1014 interference contrast microscopy. **A:** Akinetes or developing akinetes, **H:** Heterocyst, **V:**  
1015 Vegetative cell. Scale bar for panel A-C is 20  $\mu\text{m}$ . The purity of the heterocysts and  
1016 akinetes was  $99.52 \pm 0.48\%$  and  $96.17 \pm 0.72\%$ , respectively.

1017  
1018 **FIGURE 2** Venn analysis showing the proteomic profiles from akinetes (A), heterocysts  
1019 (H), and vegetative cells (V).

1020 **45 A:** 45 proteins were detected exclusive to akinetes; **57 H:** 57 proteins were found to be  
1021 heterocyst-specific; **485 V:** 485 proteins were found exclusively in vegetative cells; **57**  
1022 **A+H:** 57 proteins were detected in both akinetes and heterocysts; **144 V+A:** 144 proteins  
1023 were detected in both vegetative cells and akinetes; **189 V+H:** 189 proteins were detected  
1024 in both vegetative cells and heterocysts; and **448 A+V+H:** 448 proteins were found to be  
1025 common to all three cell types.

1026  
1027 **FIGURE 3** The HAVe (Heterocysts, Akinetes and Vegenerative cells) model suggesting  
1028 metabolic networks of cyanophycin and carbohydrates among heterocysts, akinetes, and  
1029 vegetative cells.

1030

1031 Figure 1

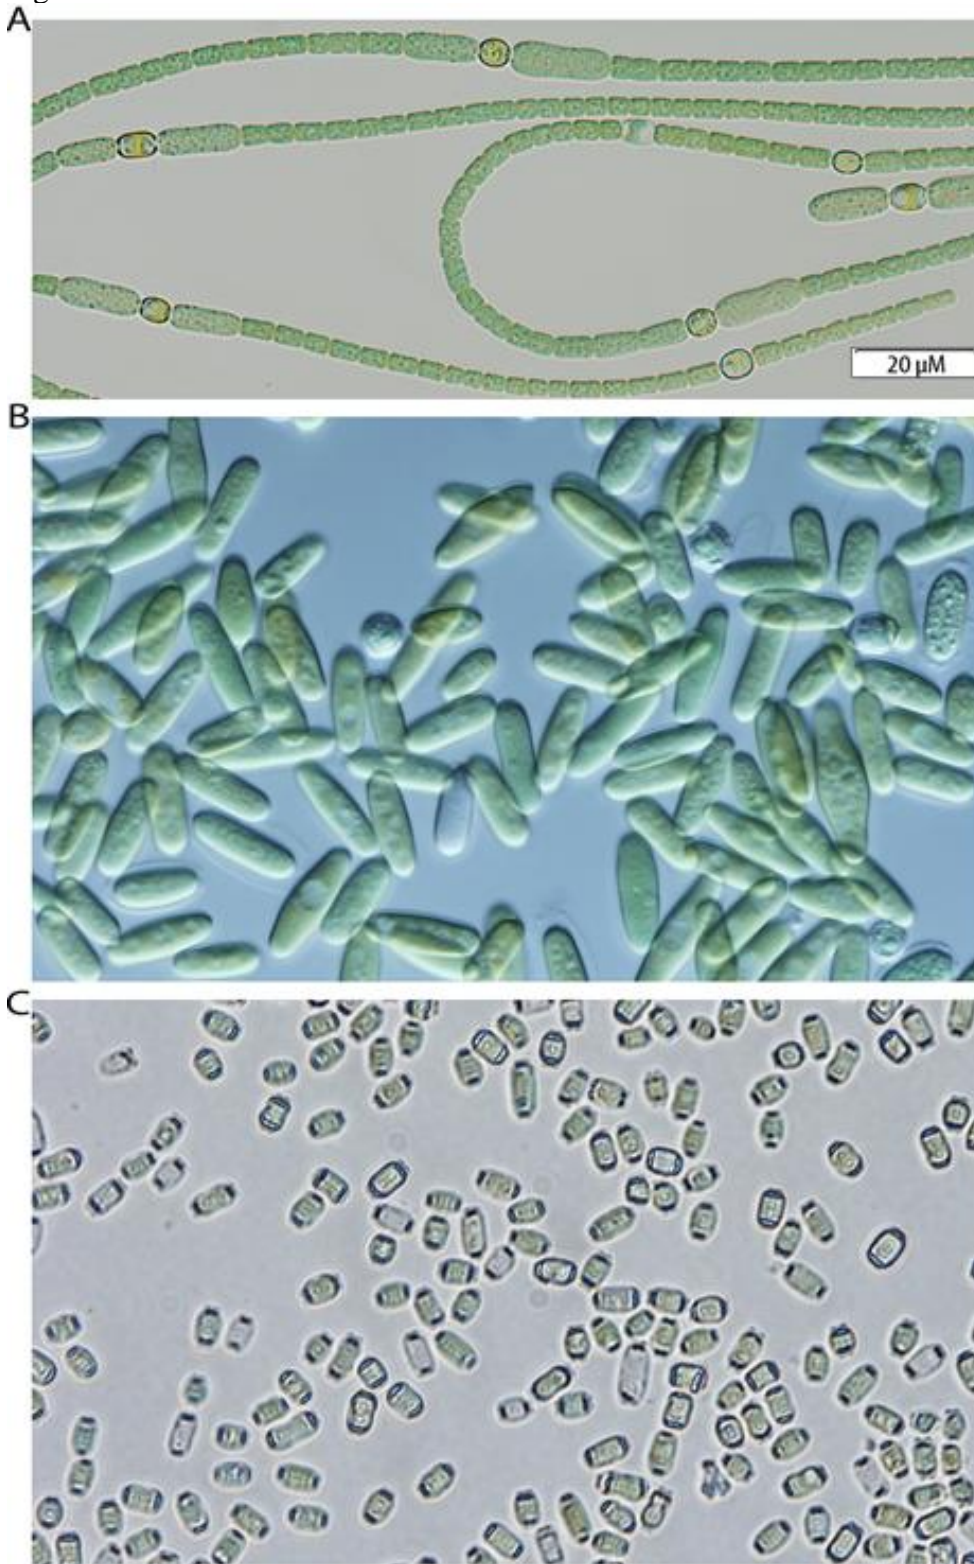

1032  
1033

1034 Figure 2

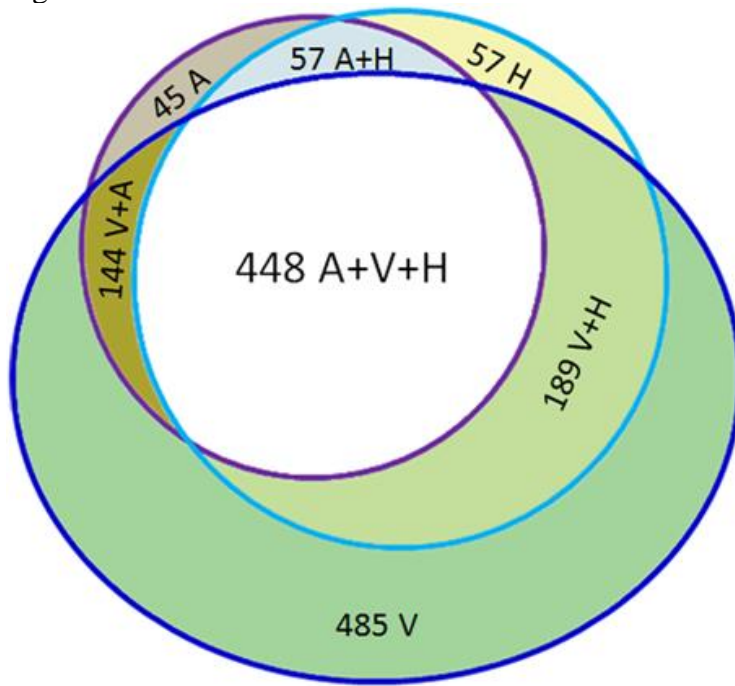

1035  
1036

*Proteomics of three cell types*

1037 Figure 3

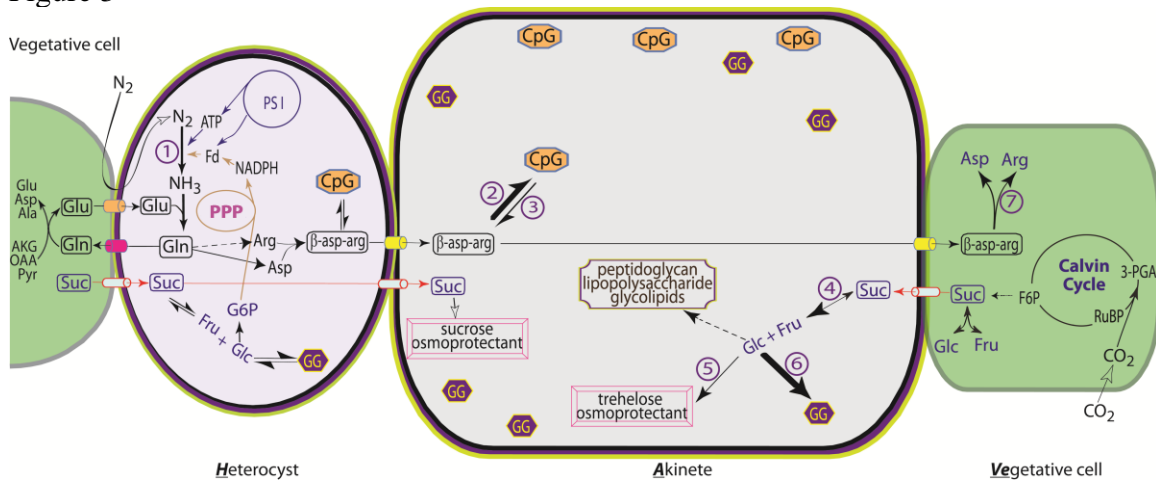

1038  
1039  
1040  
1041  
1042  
1043  
1044  
1045  
1046

**Heterocyst**  
 AKG: alpha-ketoglutarate  
 Suc: sucrose  
 G6P: glucose 6-phosphate  
 RuBP: ribulose-1,5-bisphosphate  
 GG: glycogen granule  
 ① nitrogenase  
 ④ sucrose synthase  
 ⑦ peptidase T2

**Akinete**  
 OAA: oxaloacetate  
 Fru: fructose  
 β-asp-arg: β-L-aspartyl-L-arginine  
 3-PGA: 3-phosphoglyceric acid  
 PS I: photosystem I  
 ② cyanophycin synthase  
 ⑤ malto-oligosyltrehalose synthase

**Vegetative cell**  
 Pyr: pyruvate  
 Glc: glucose  
 F6P: fructose 6-phosphate  
 CpG: cyanophycin granule  
 PPP: pentose phosphate pathway  
 ③ cyanophycinase  
 ⑥ glycogen synthase
